# Supplementary material for: Machine Learning for Automatic Prediction of the Quality of Electrophysiological Recordings
Source: PubMed Central journal article supplement (PMC3851757; doi:10.1371/journal.pone.0080838), 2013-12-04

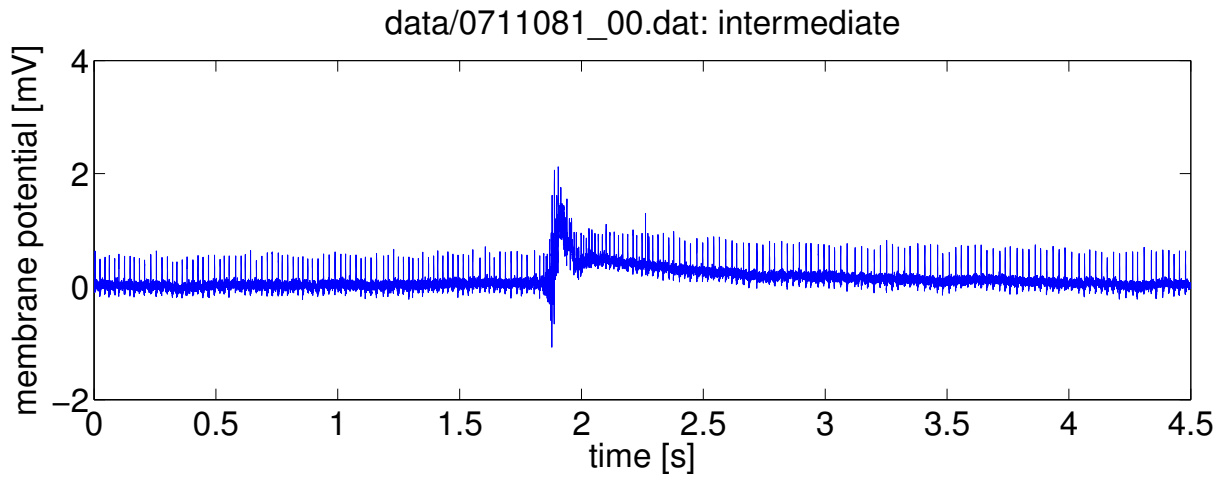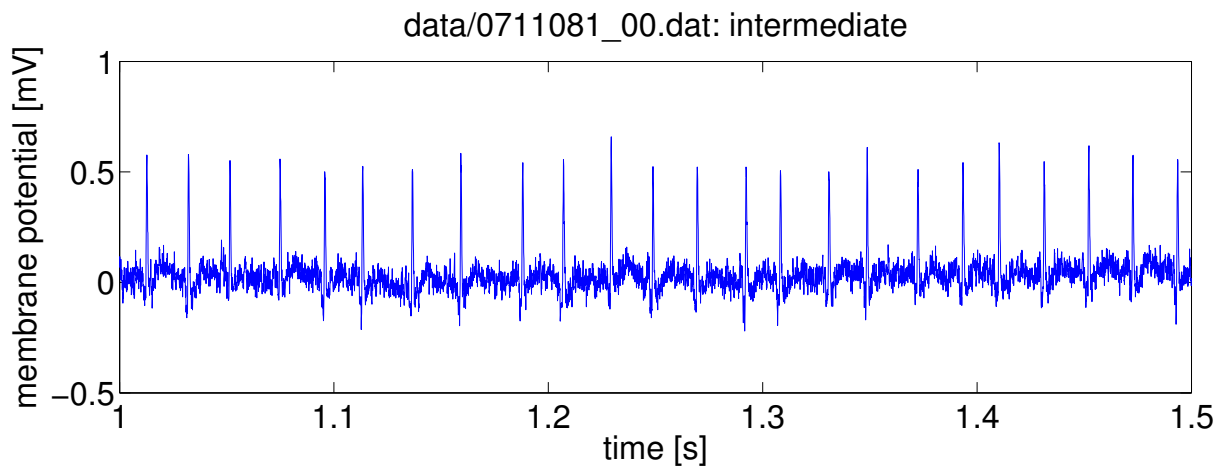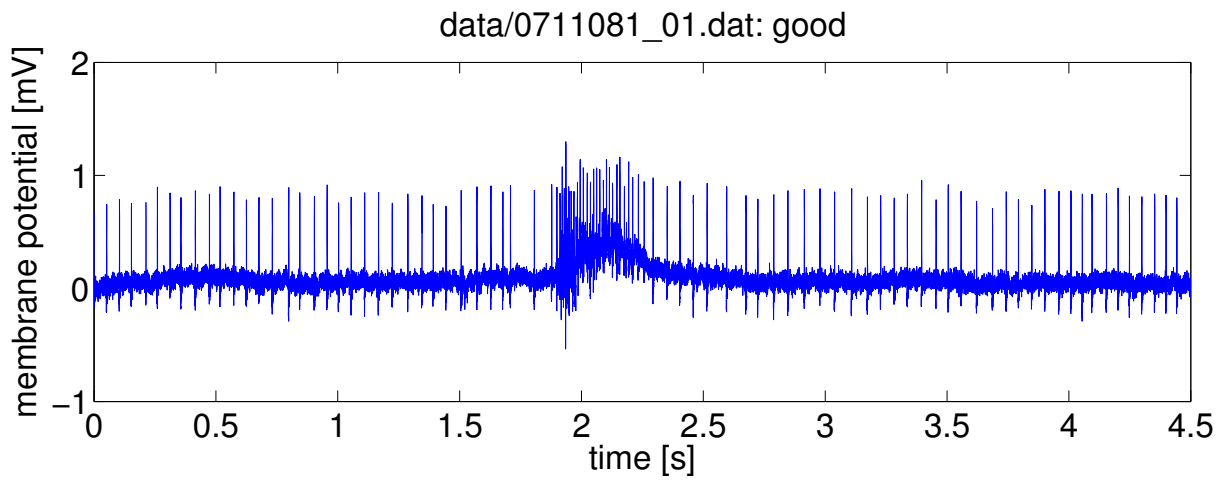

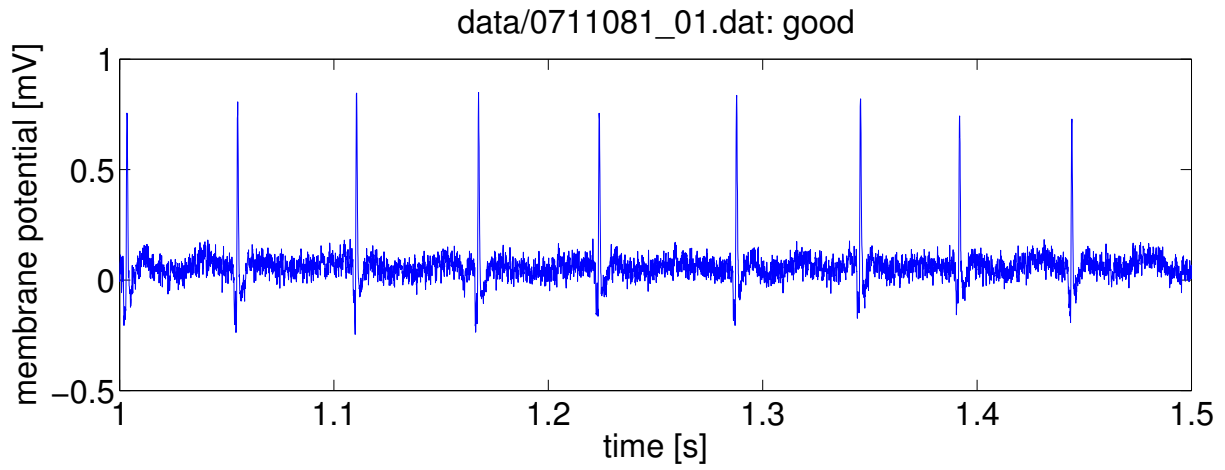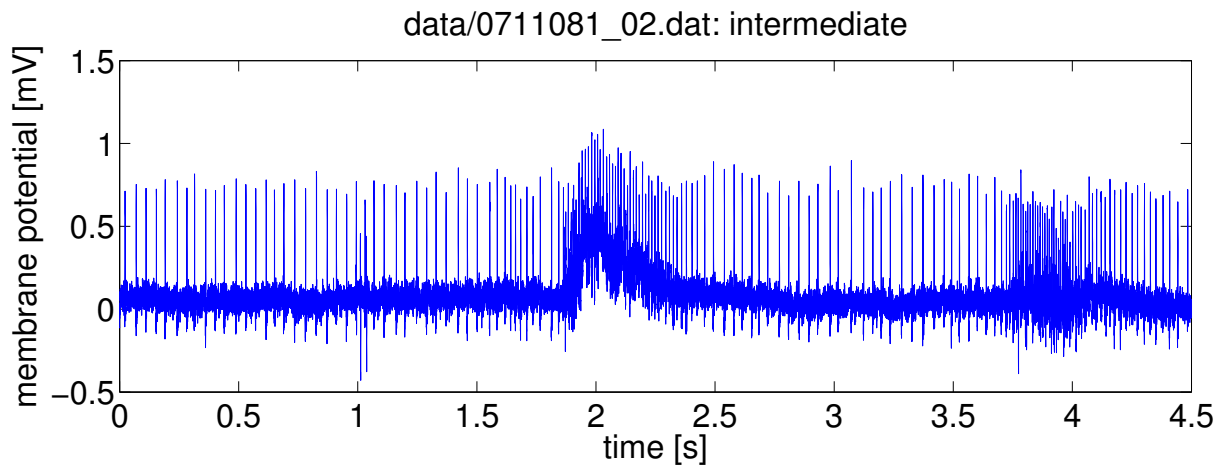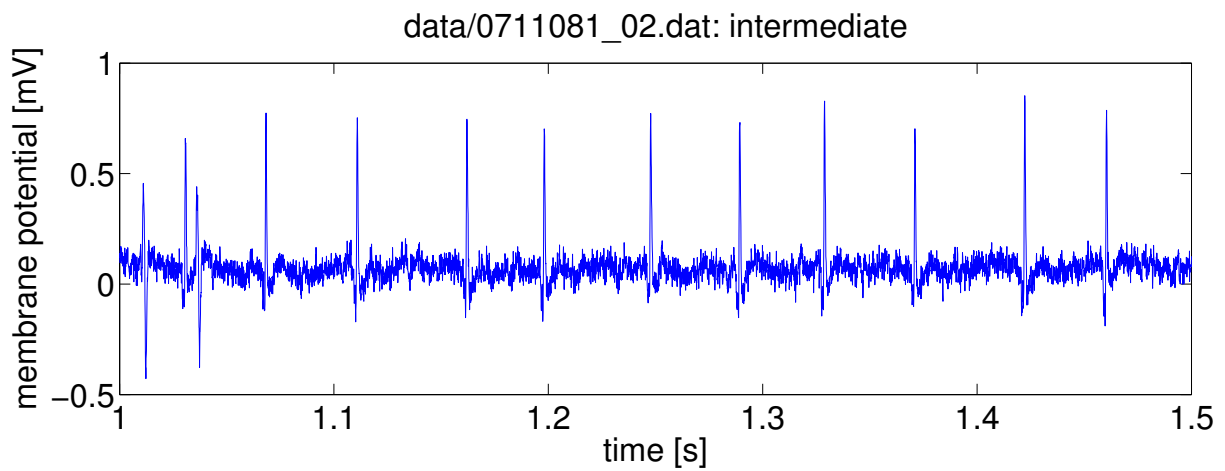

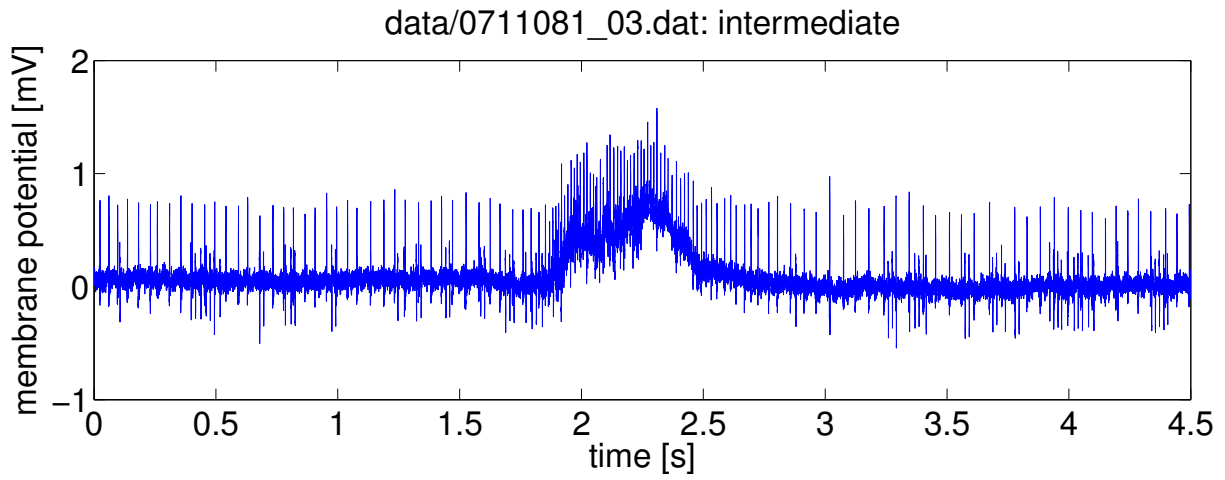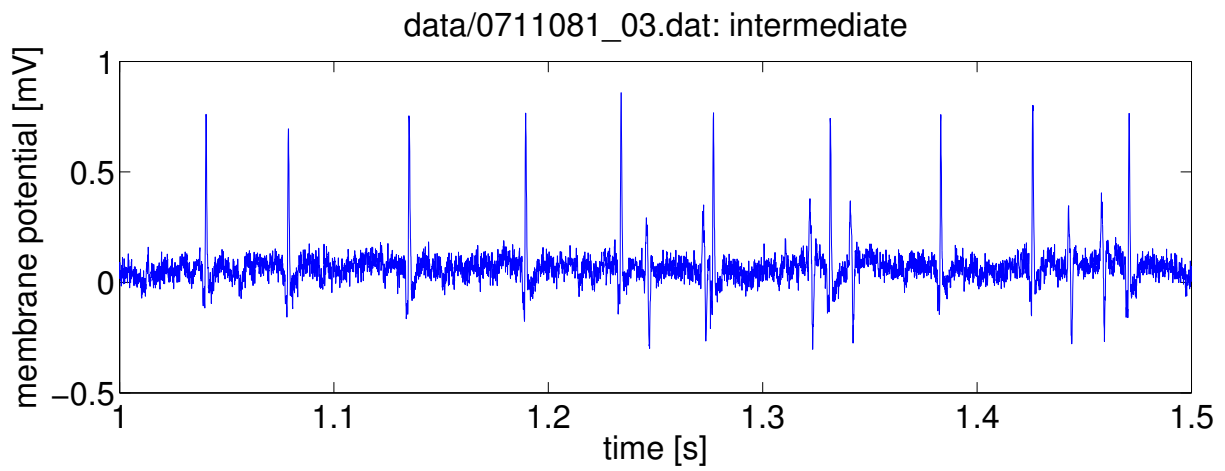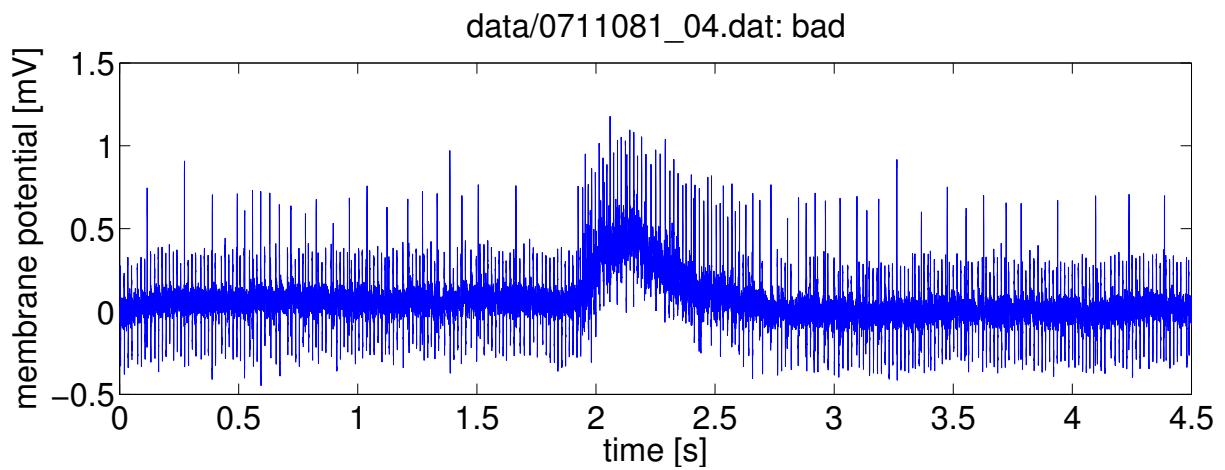

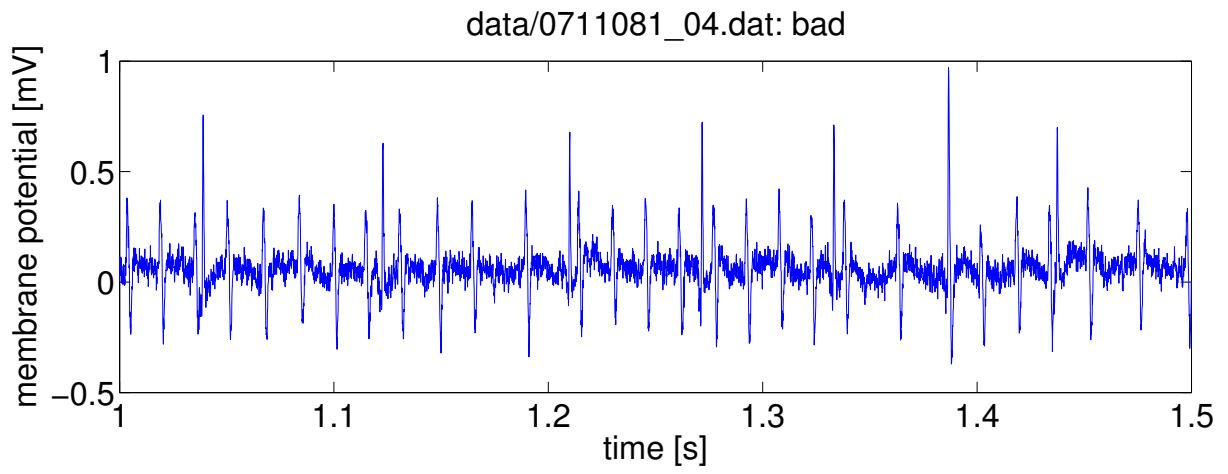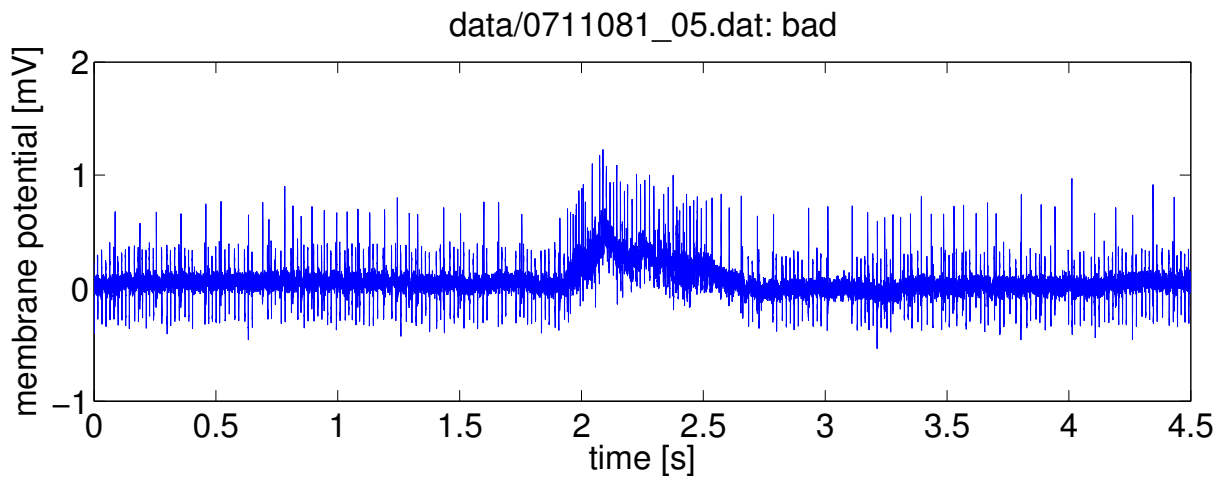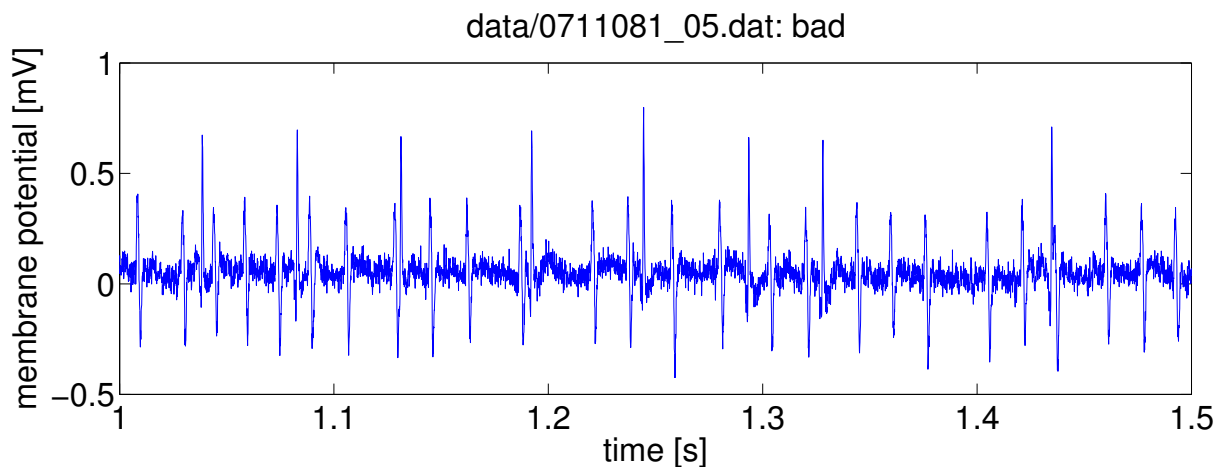

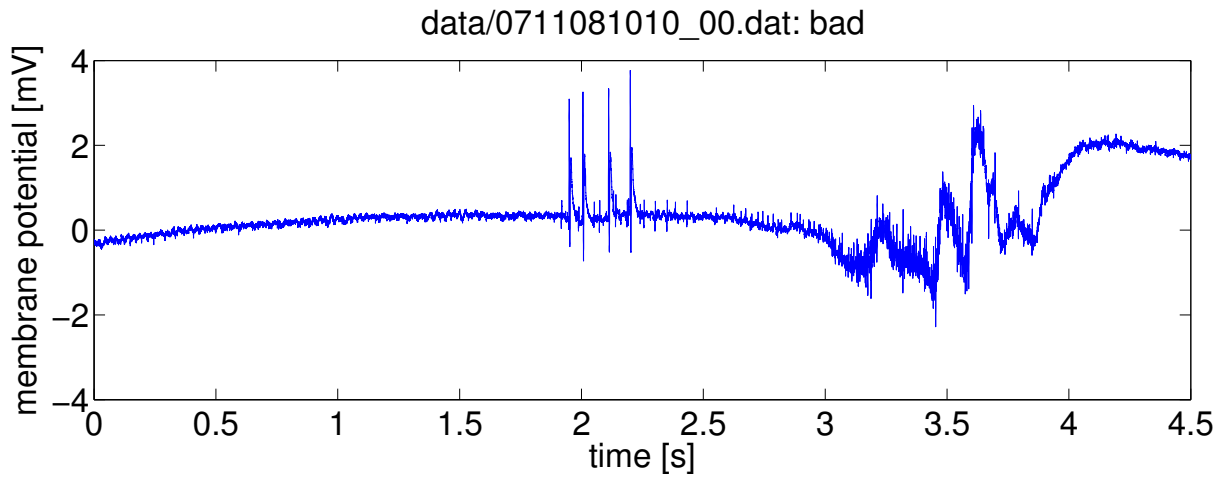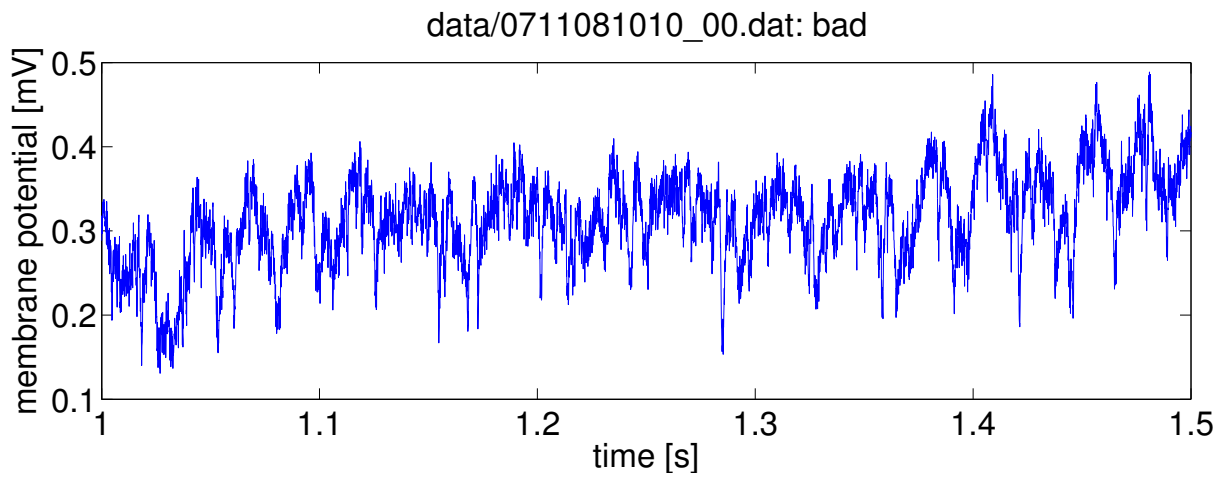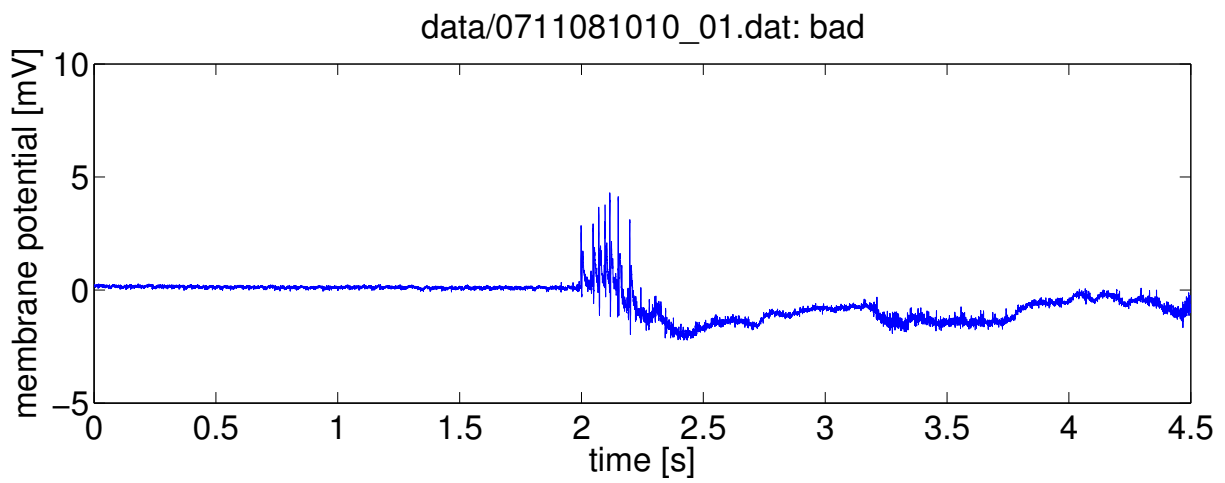

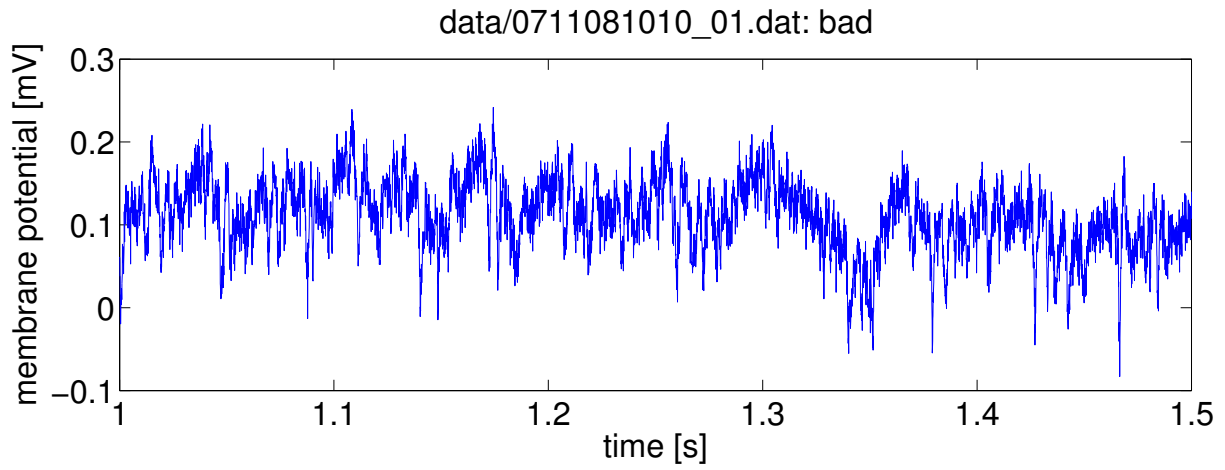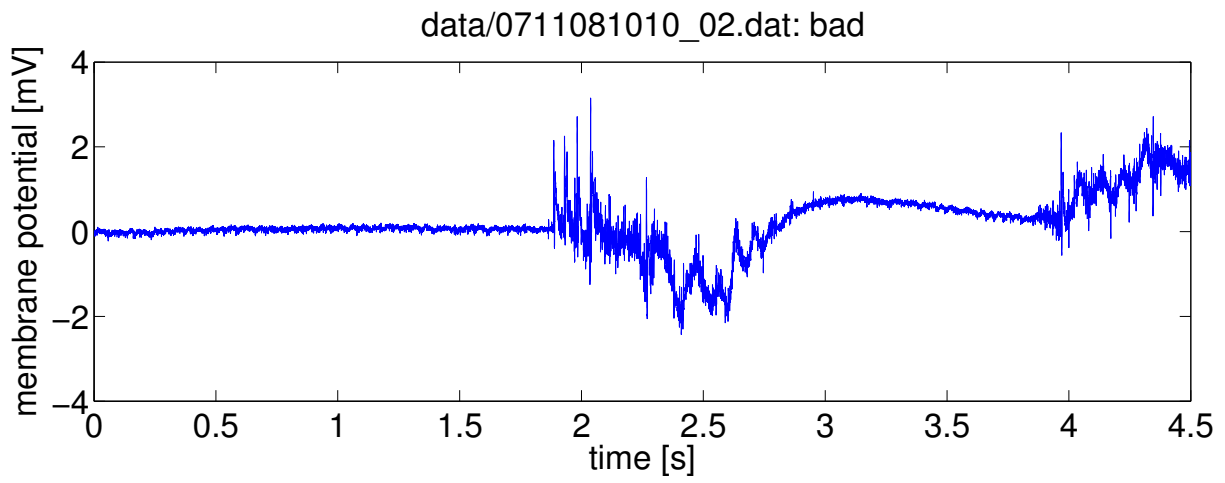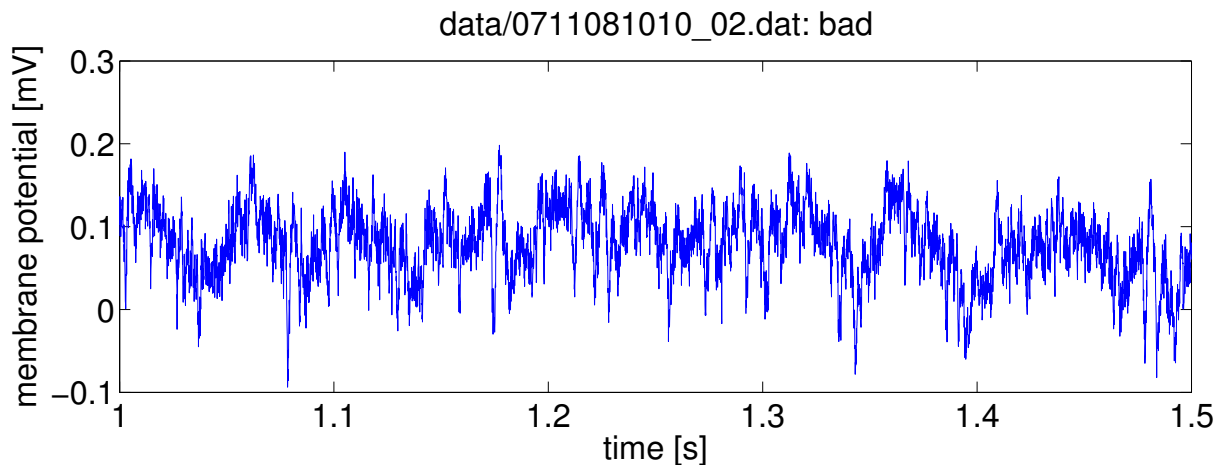

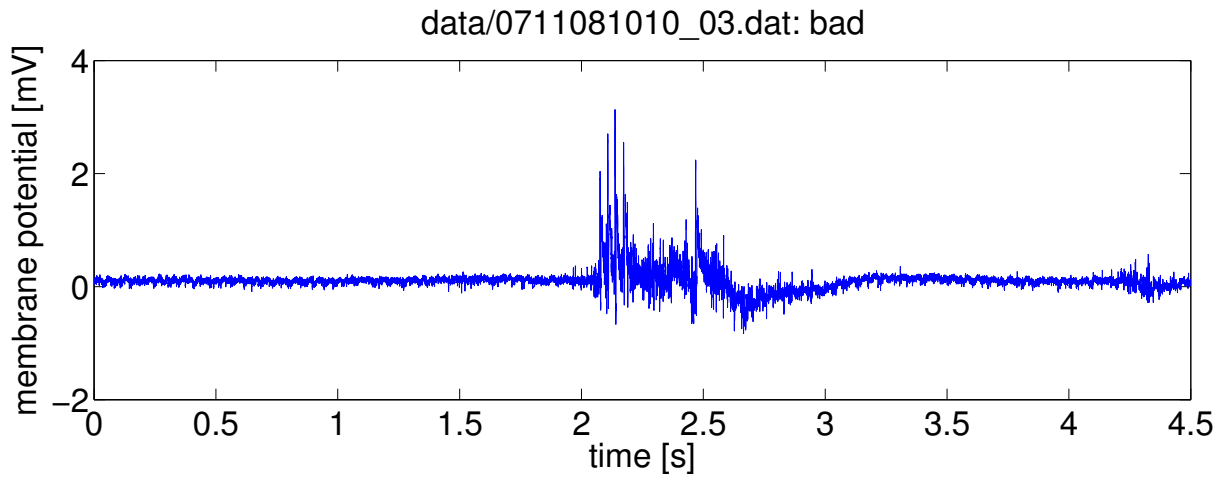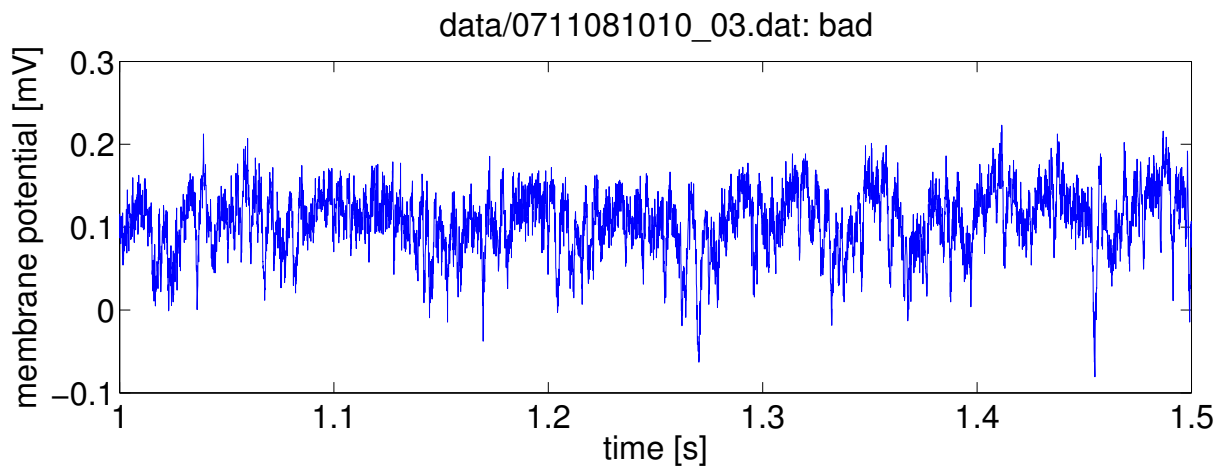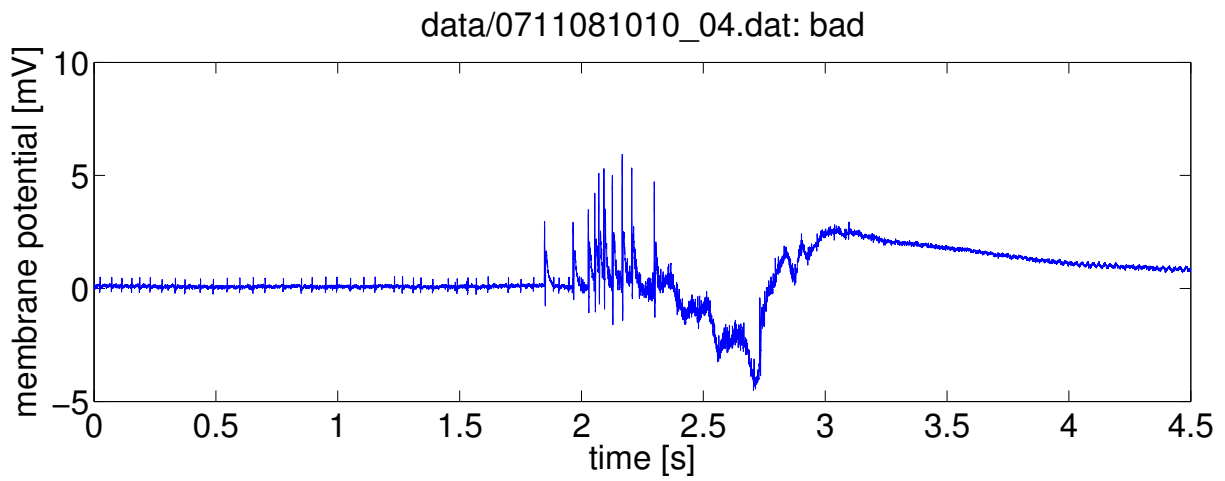

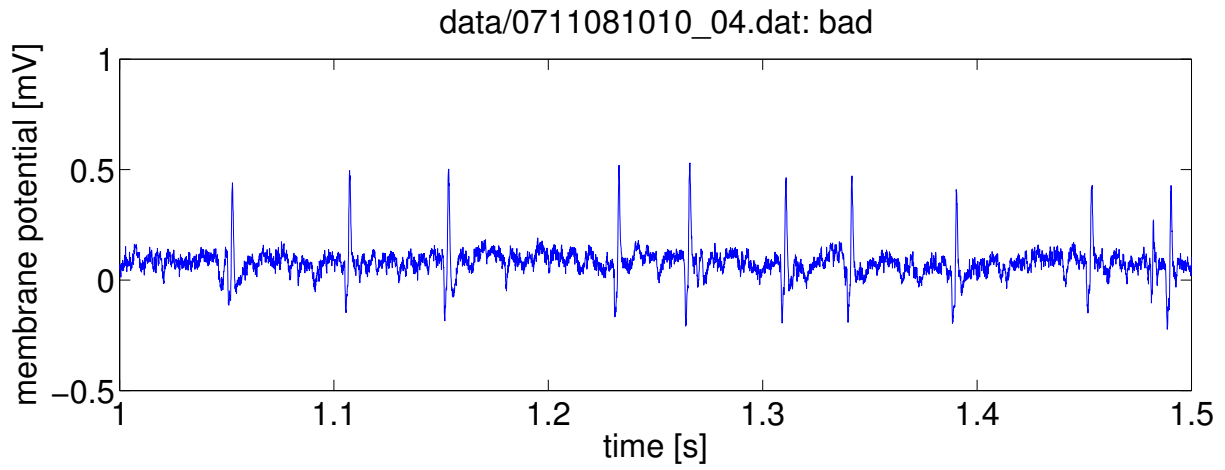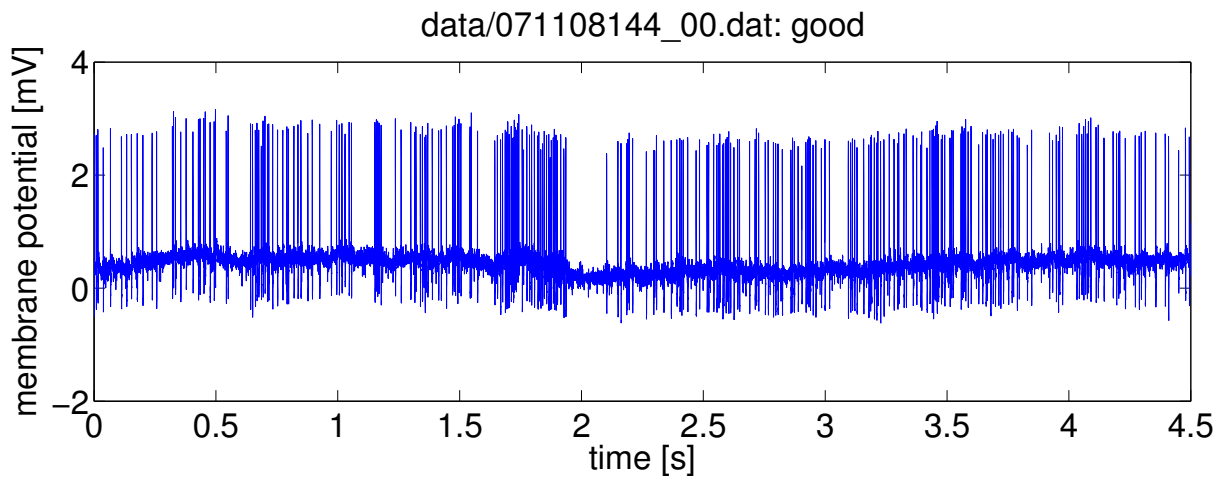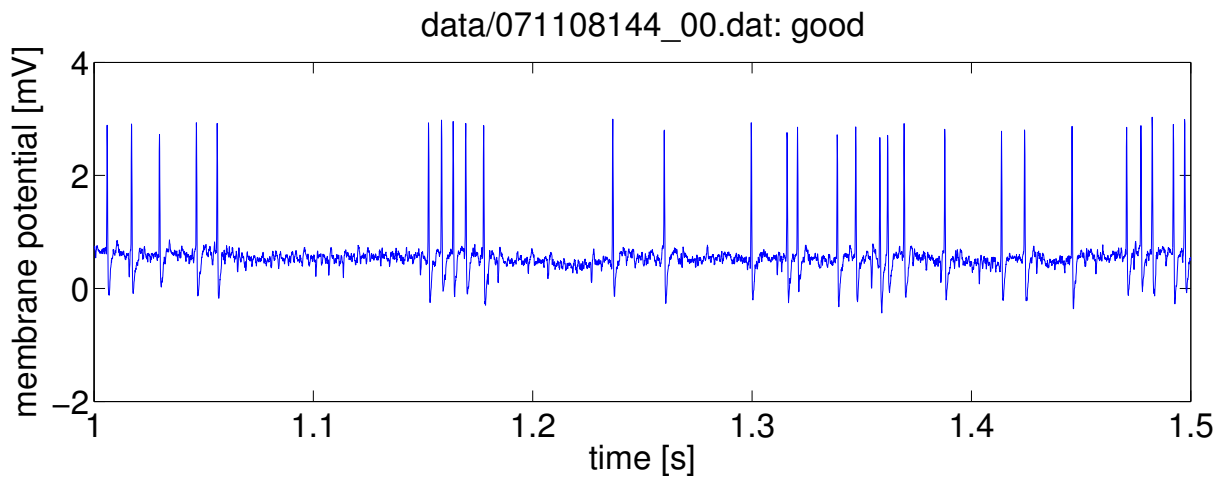



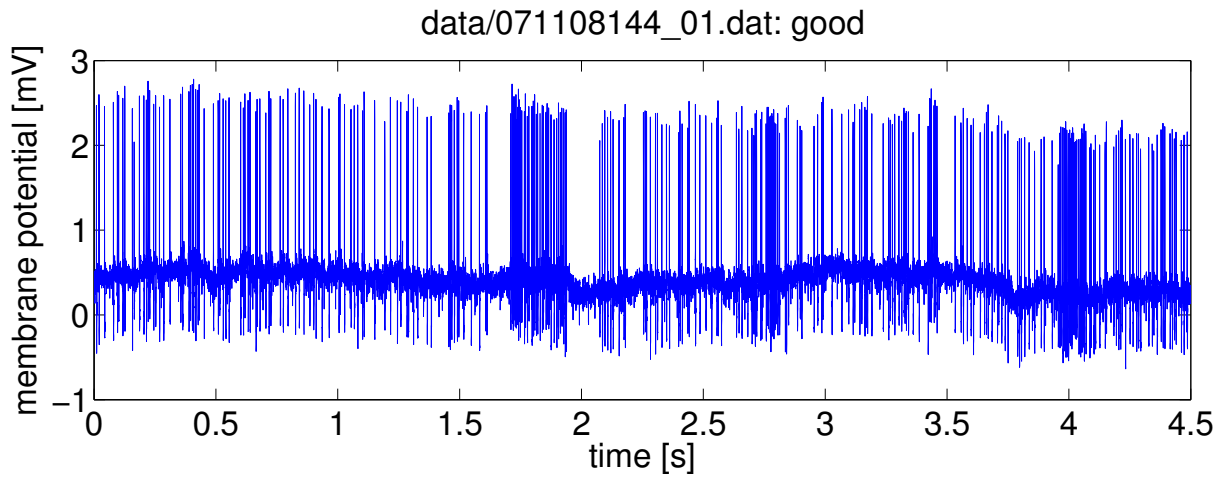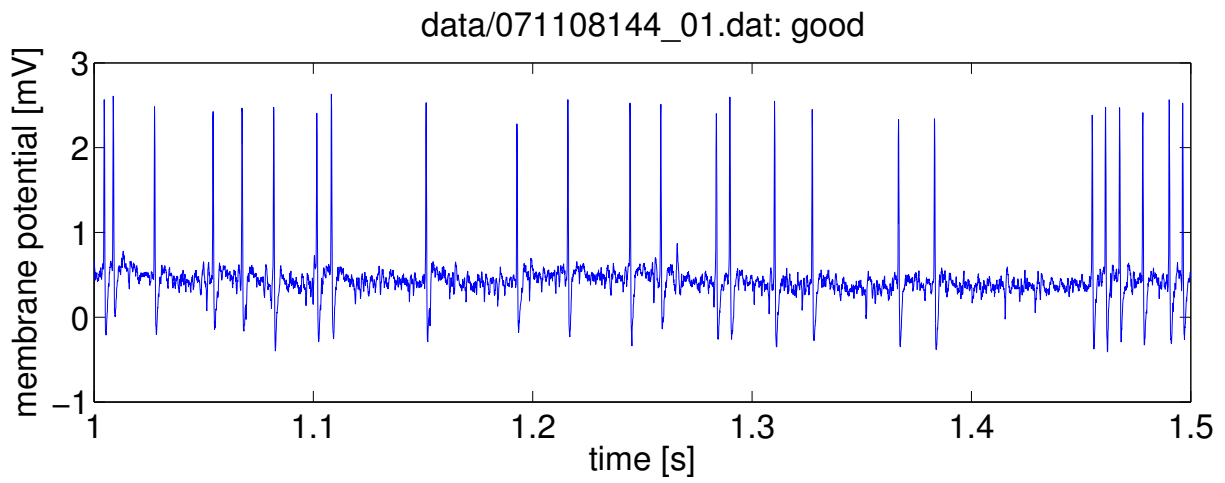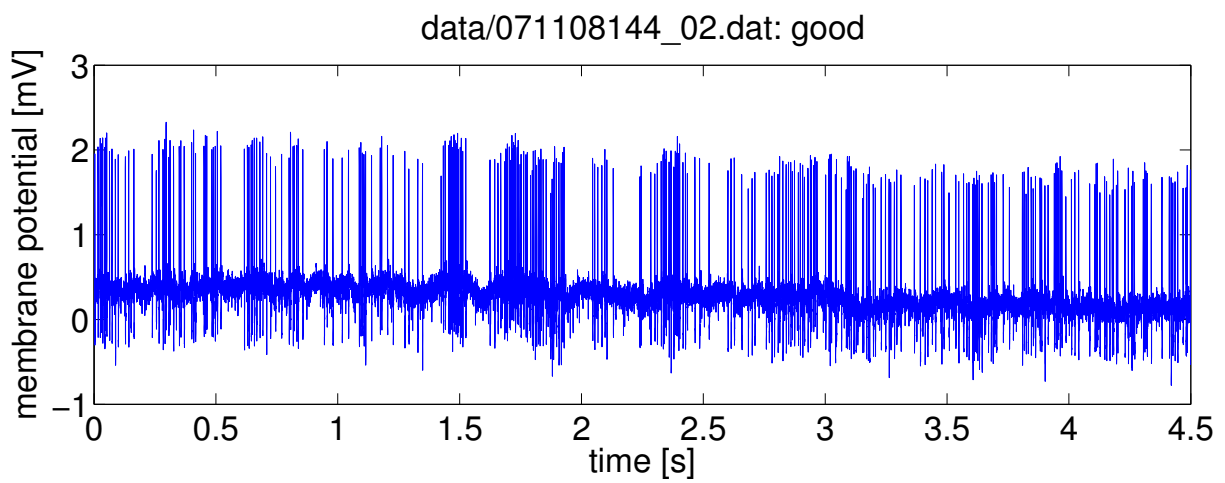

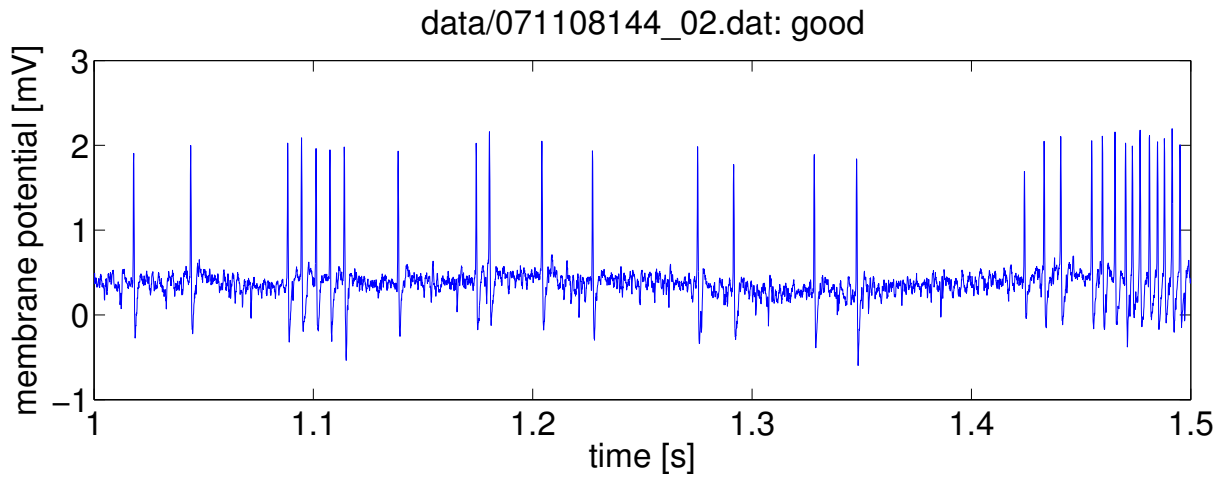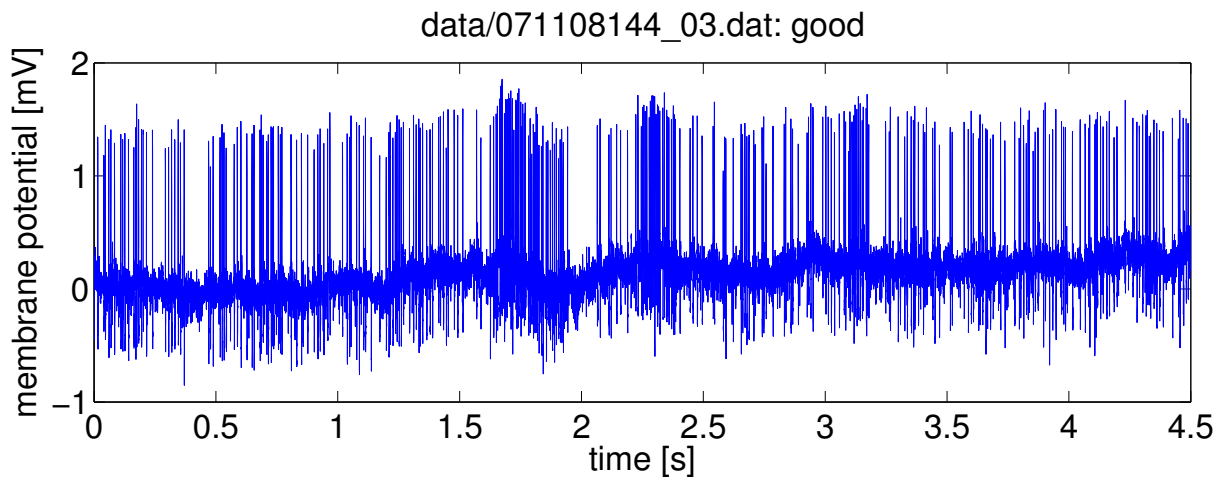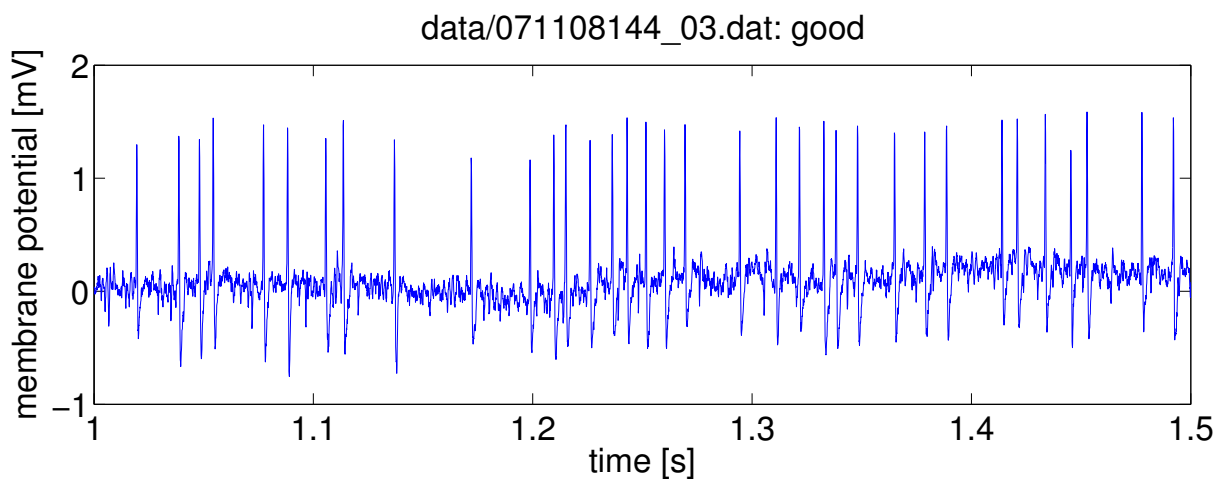

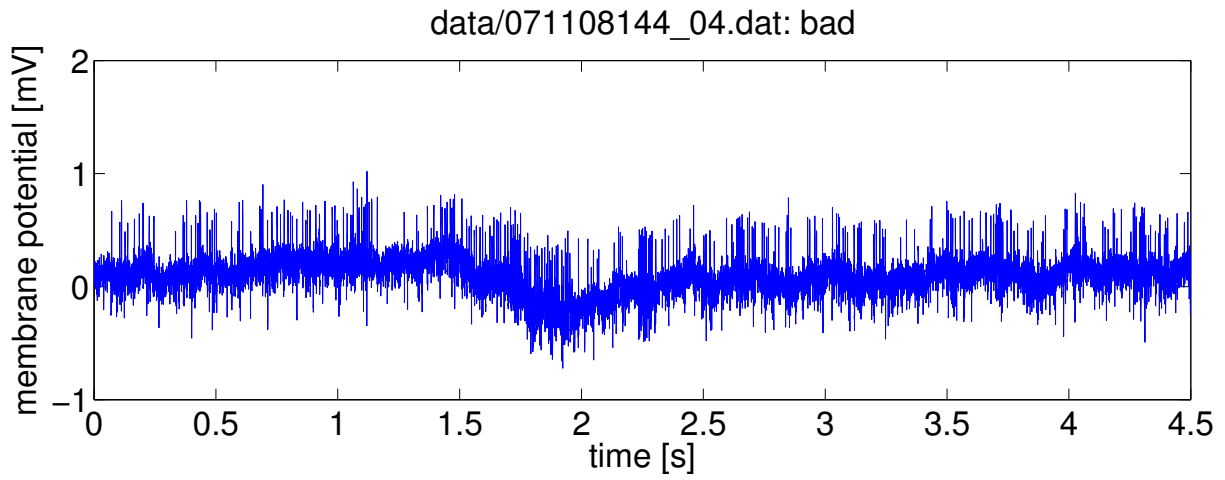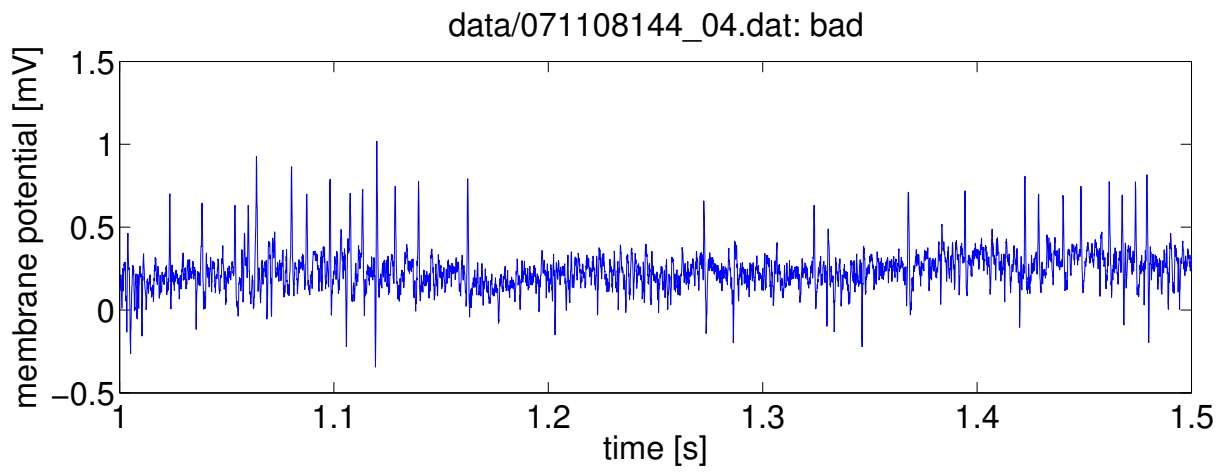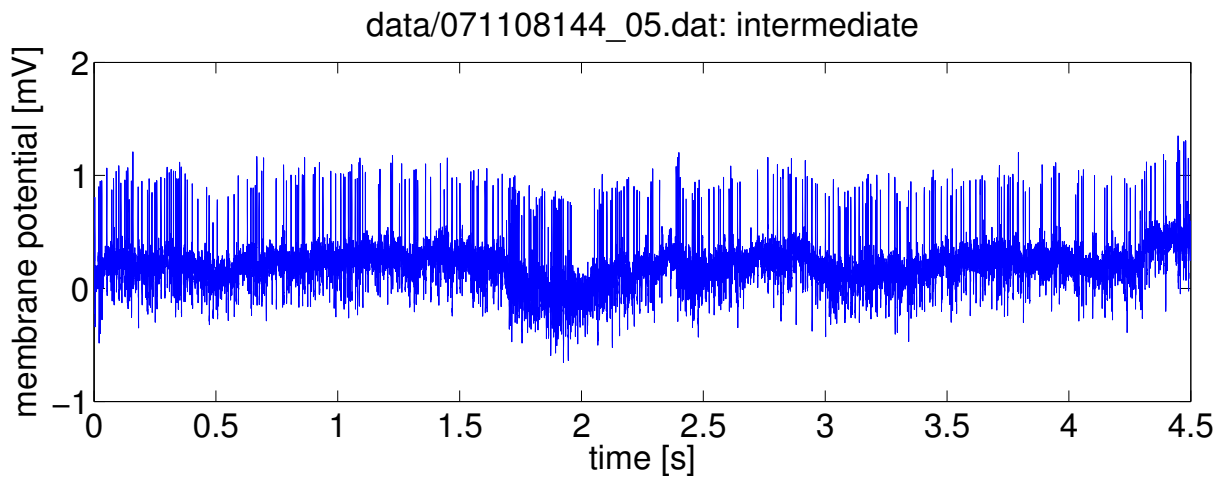

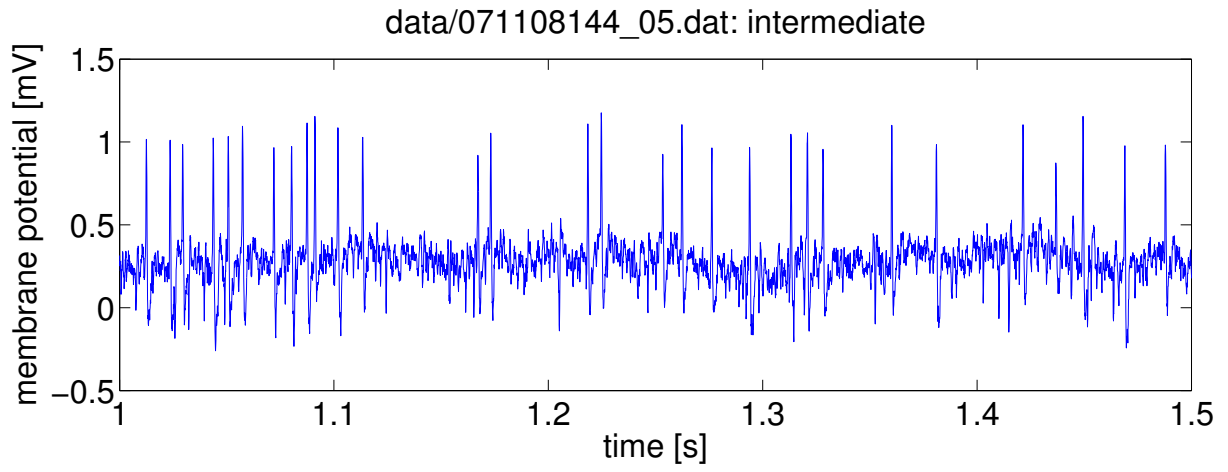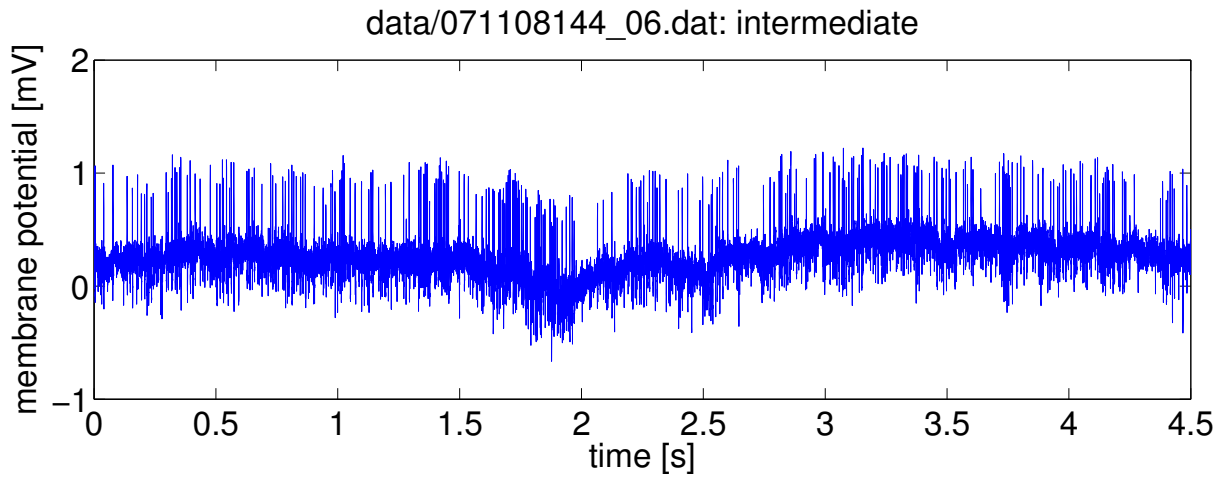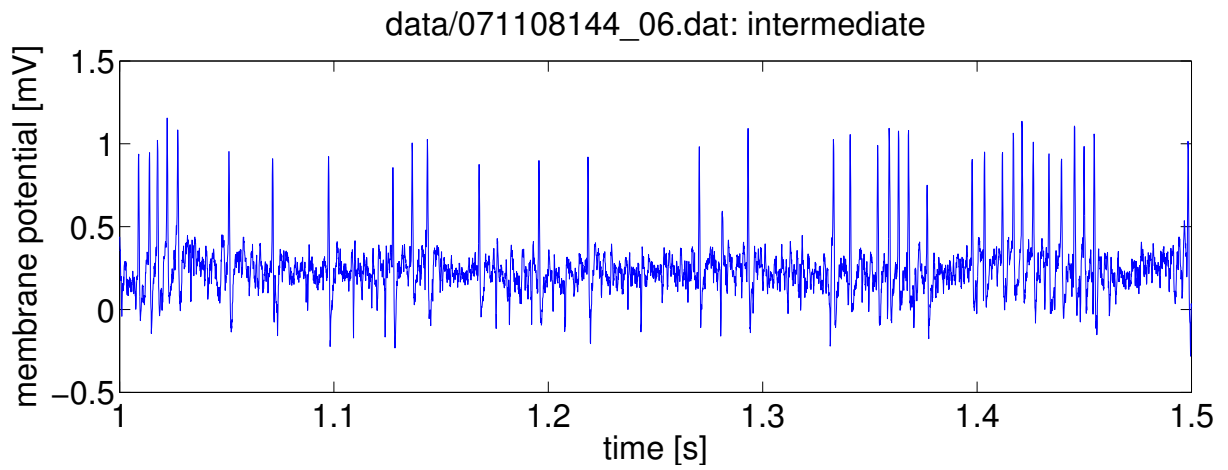

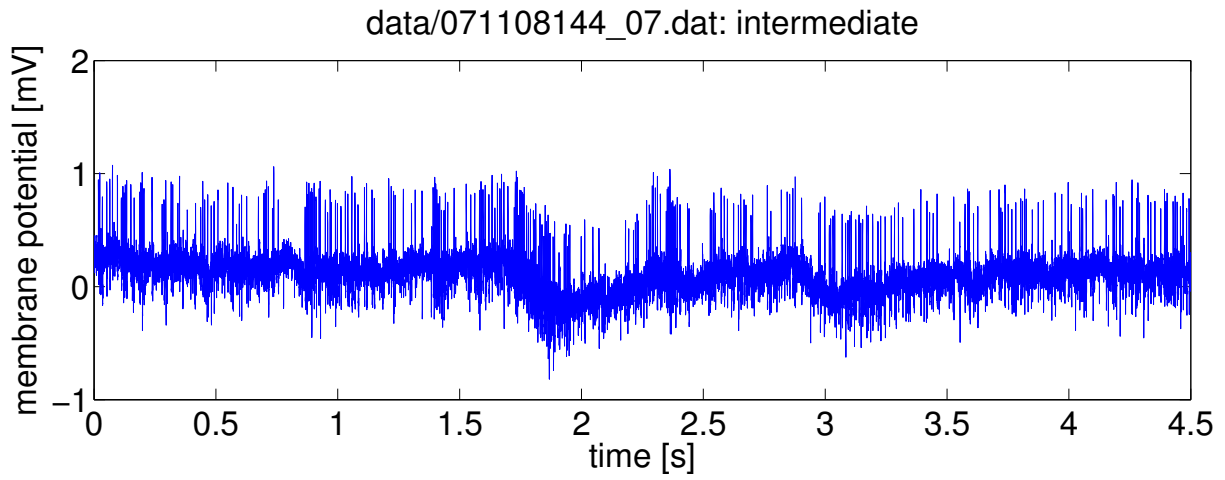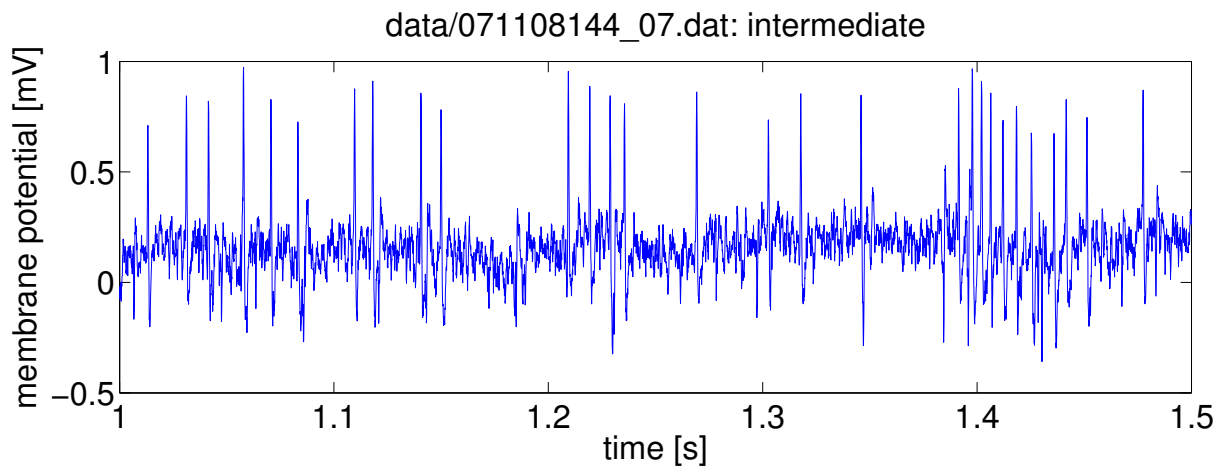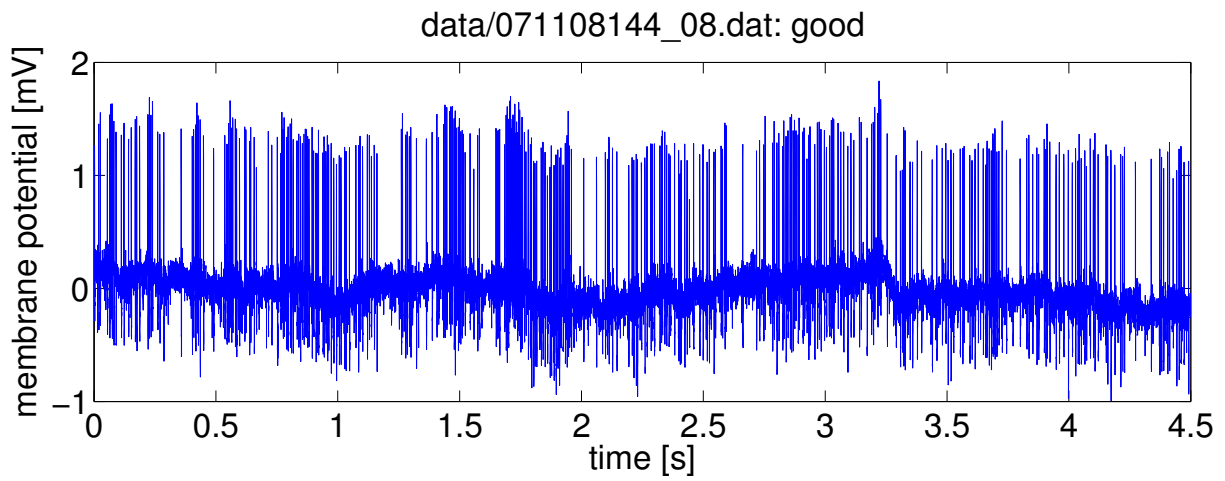

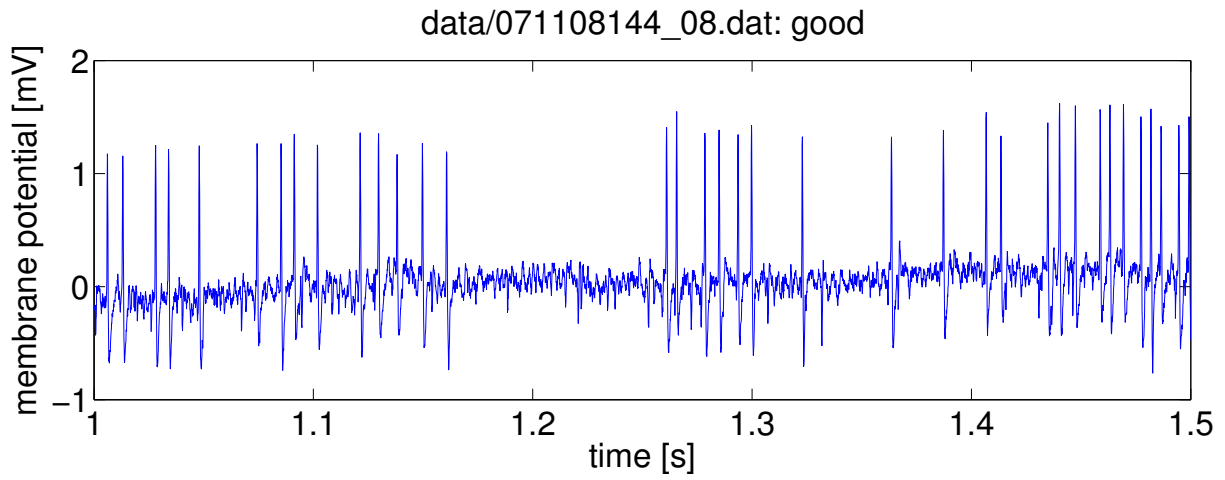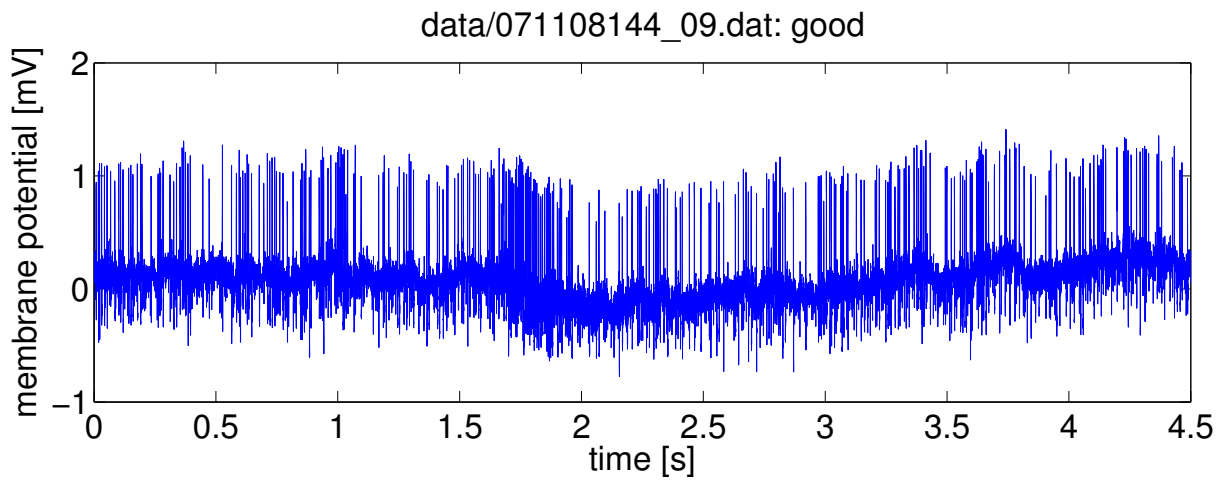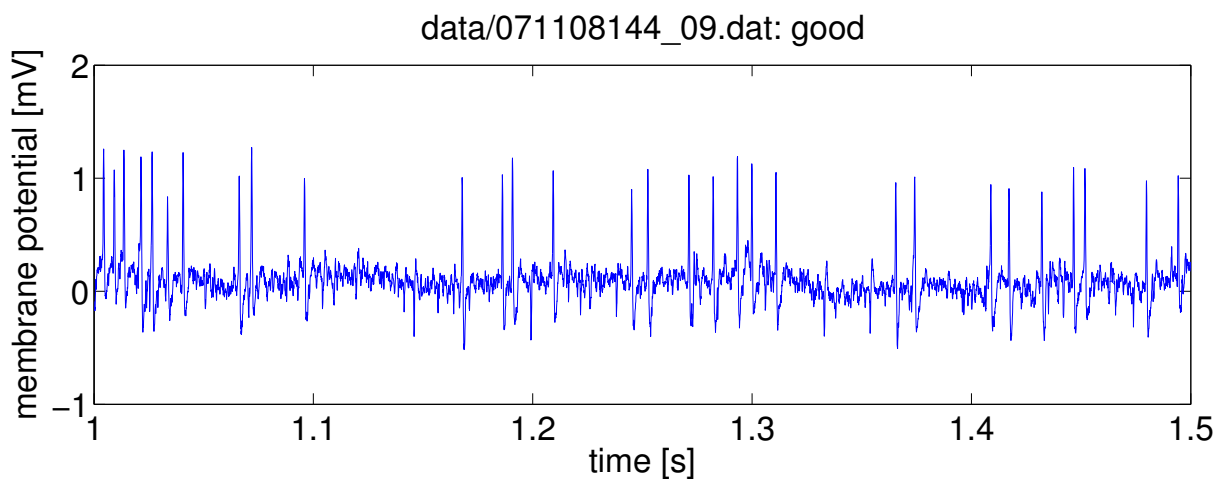

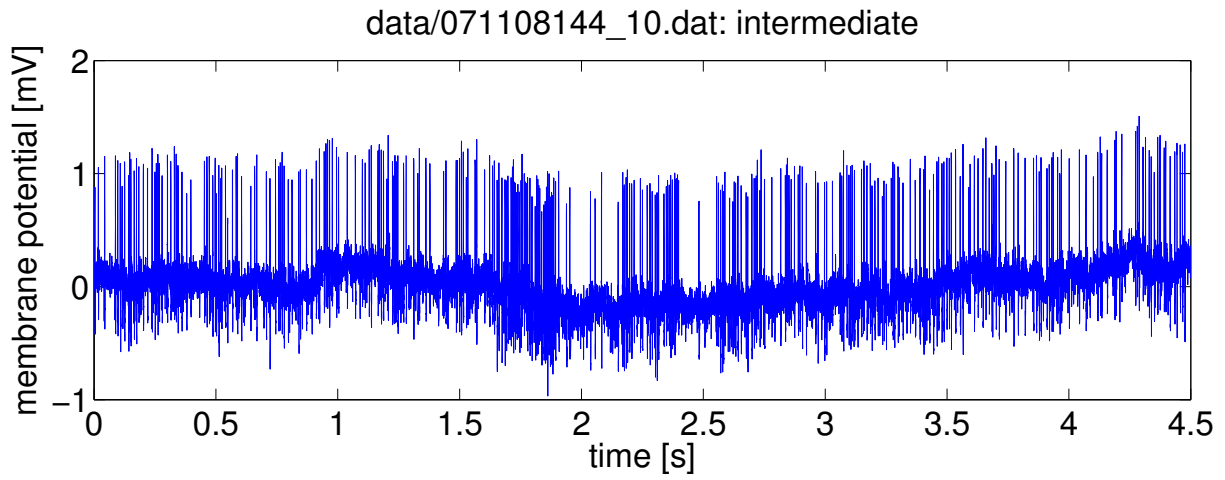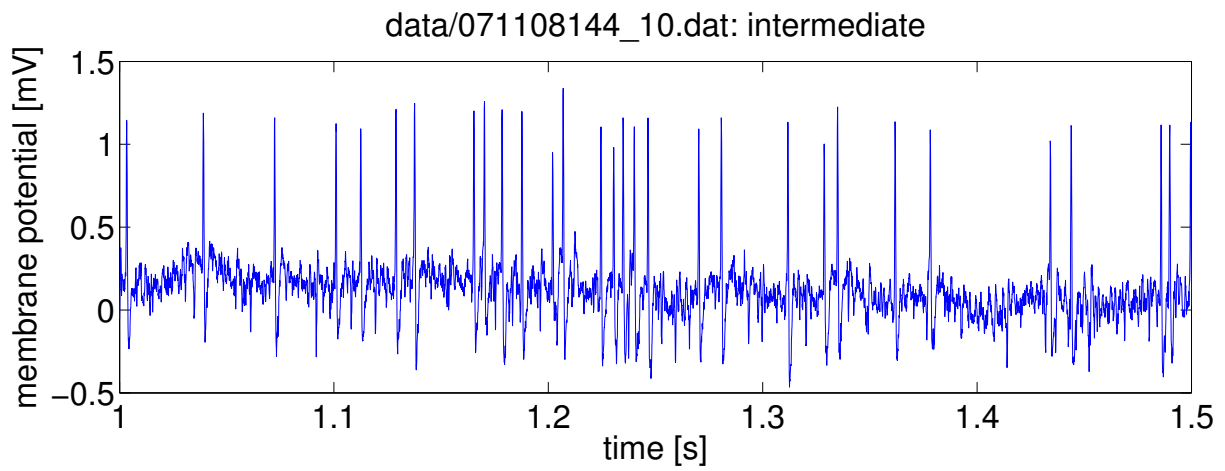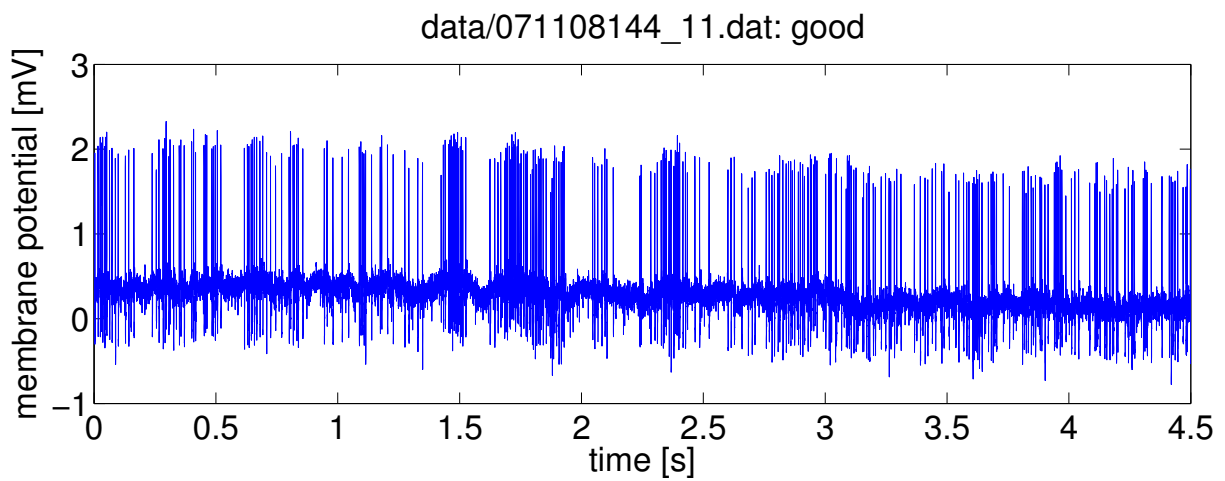

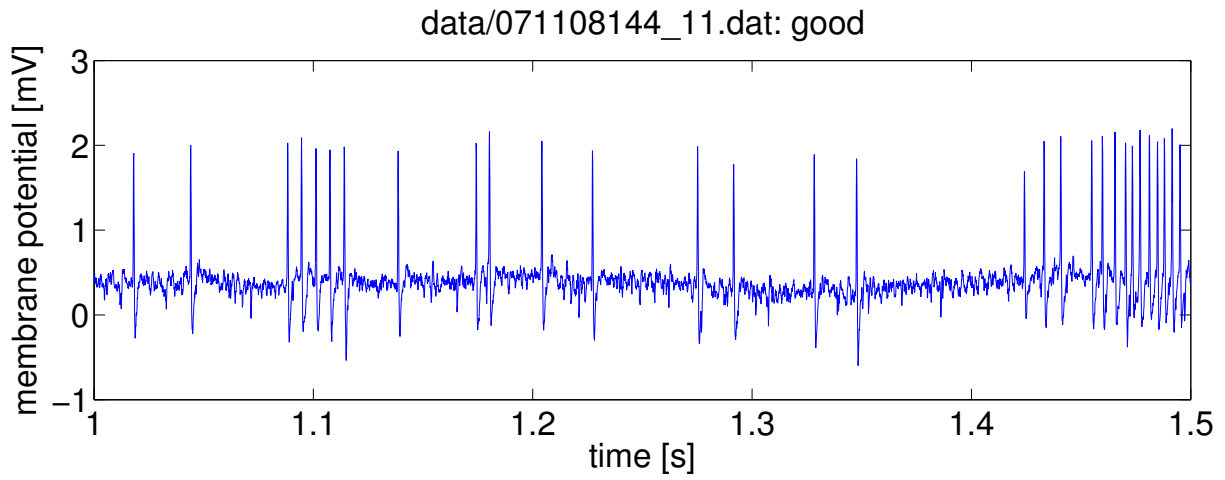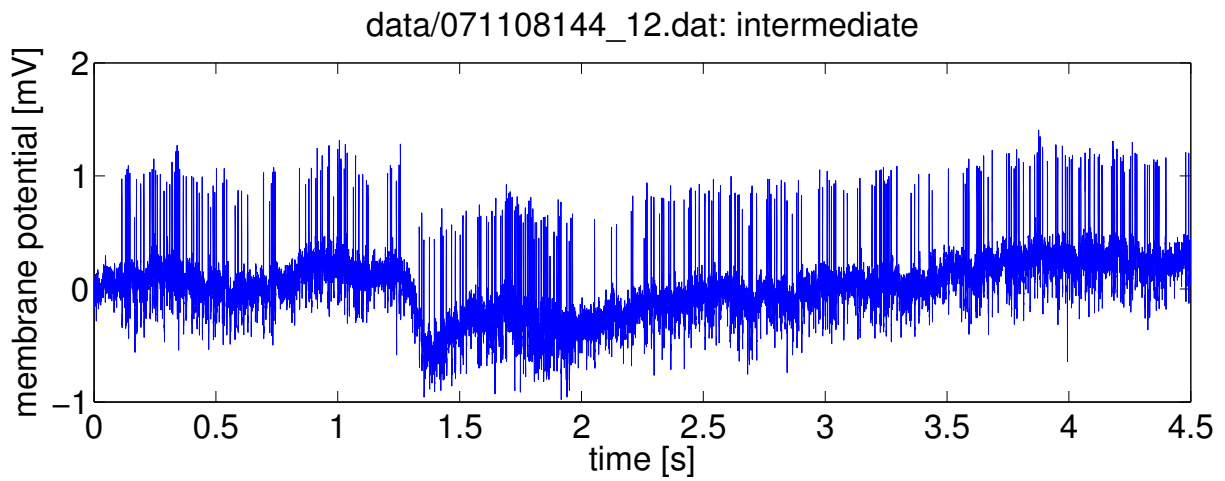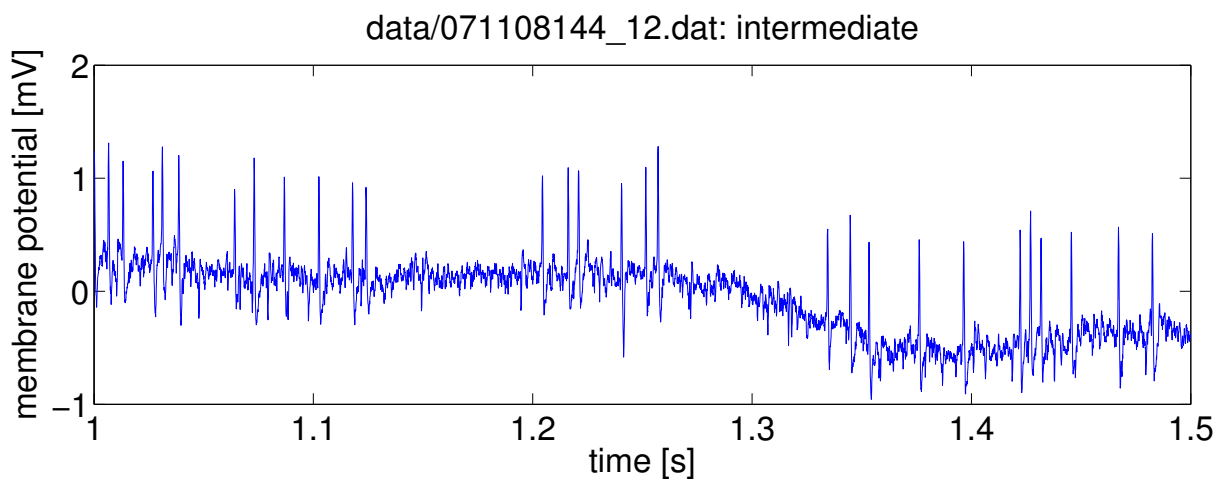



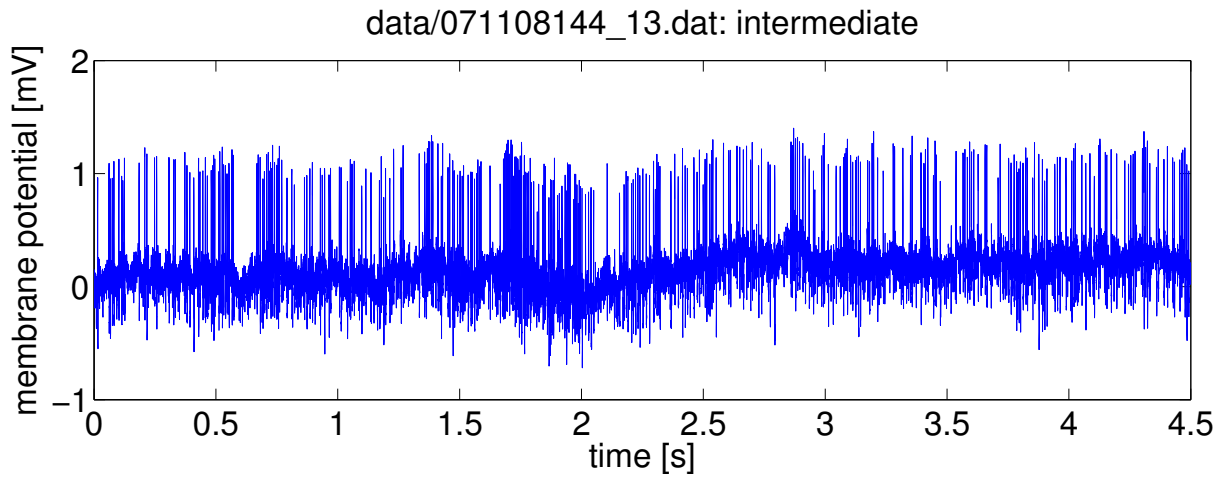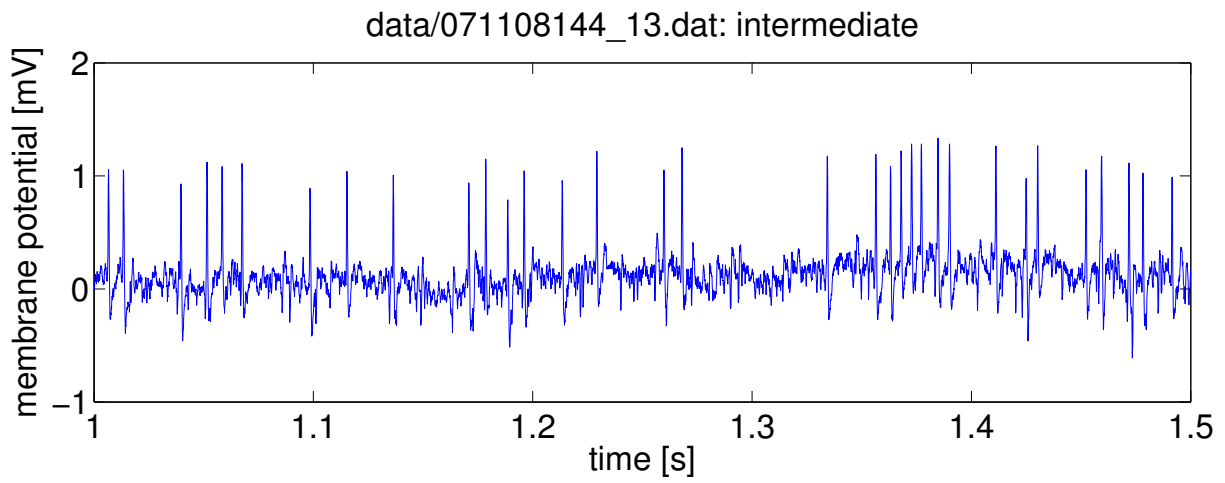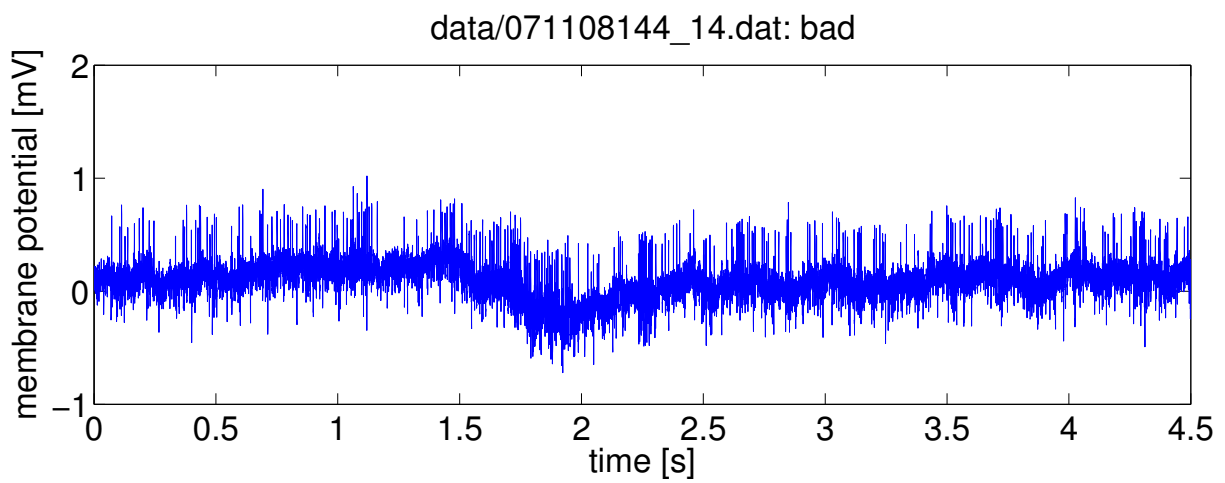

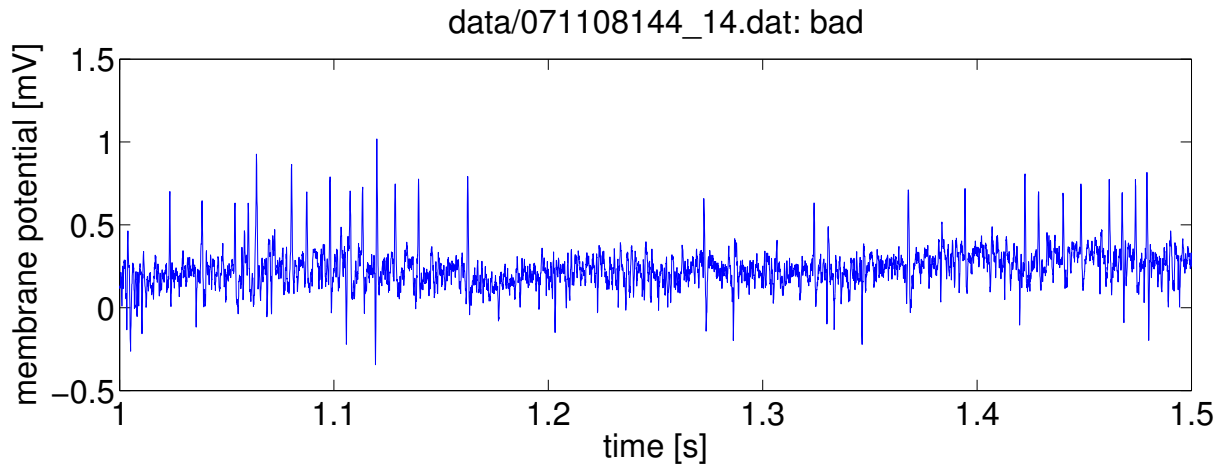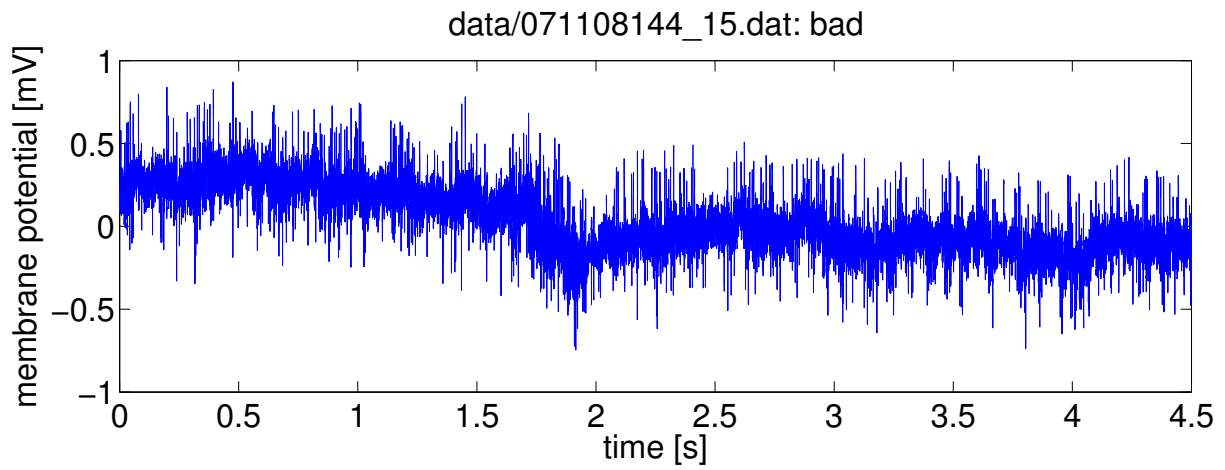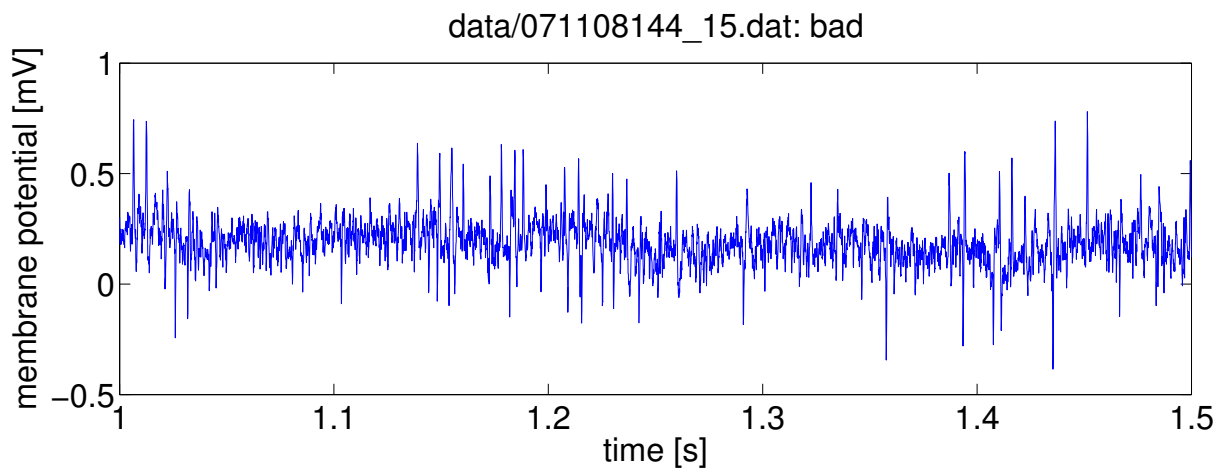

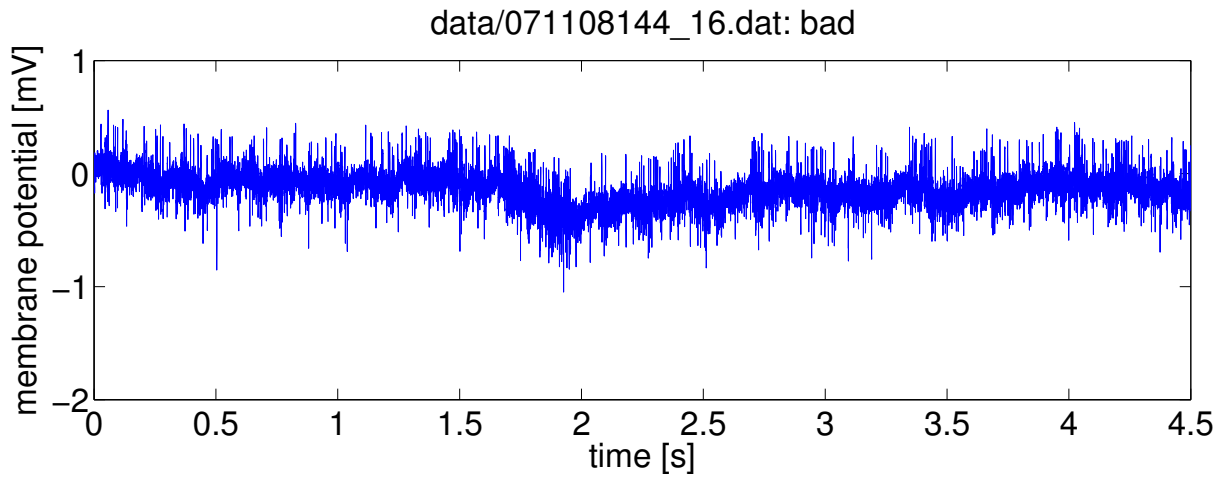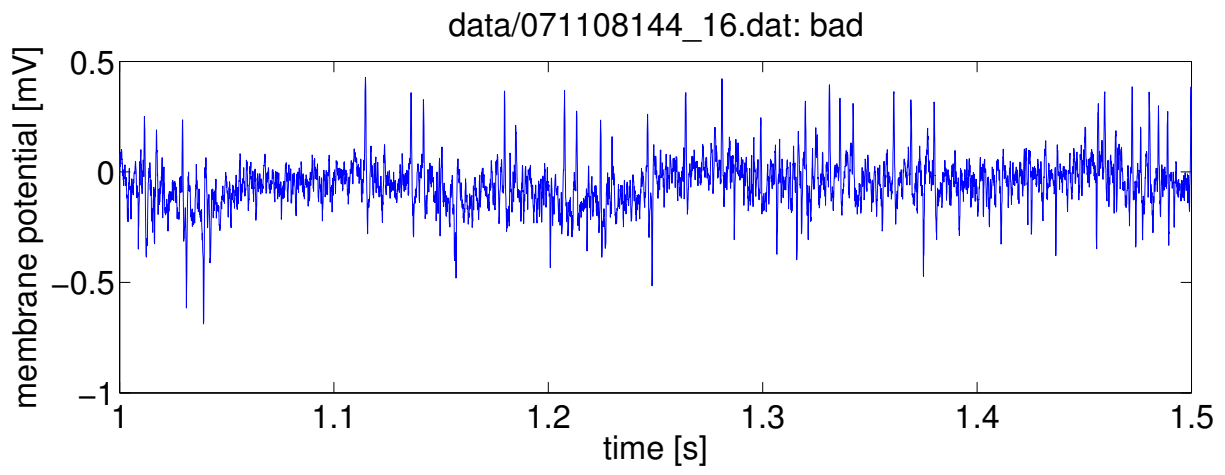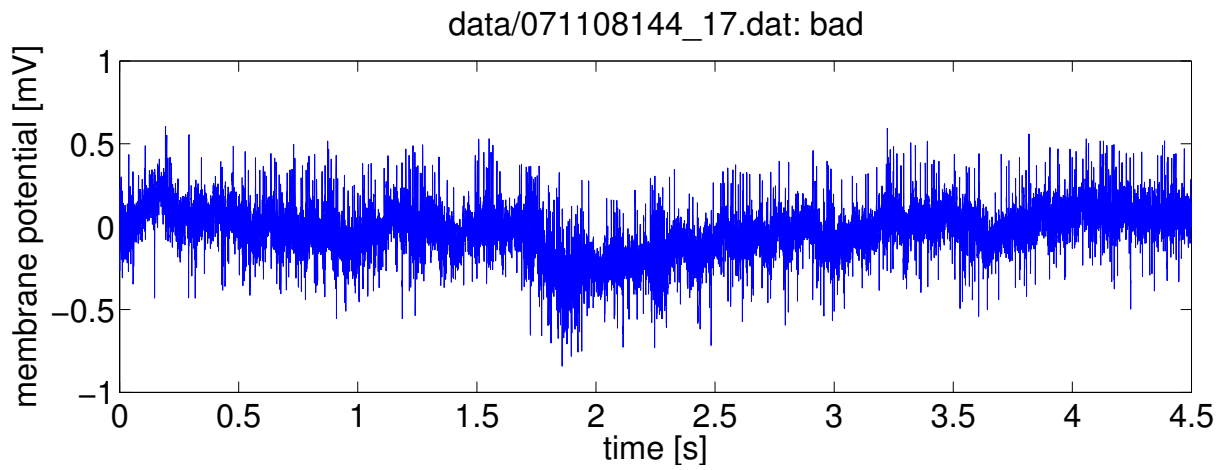

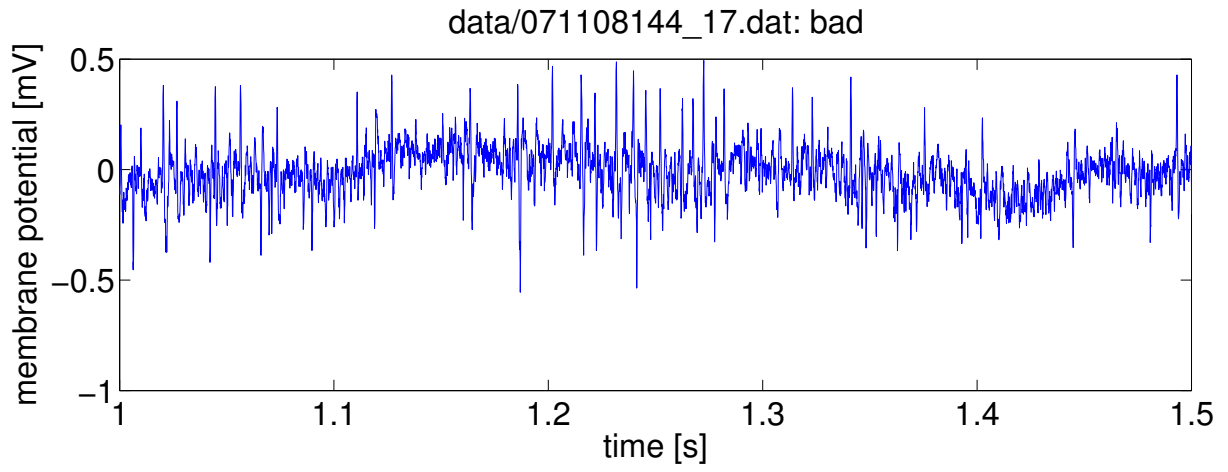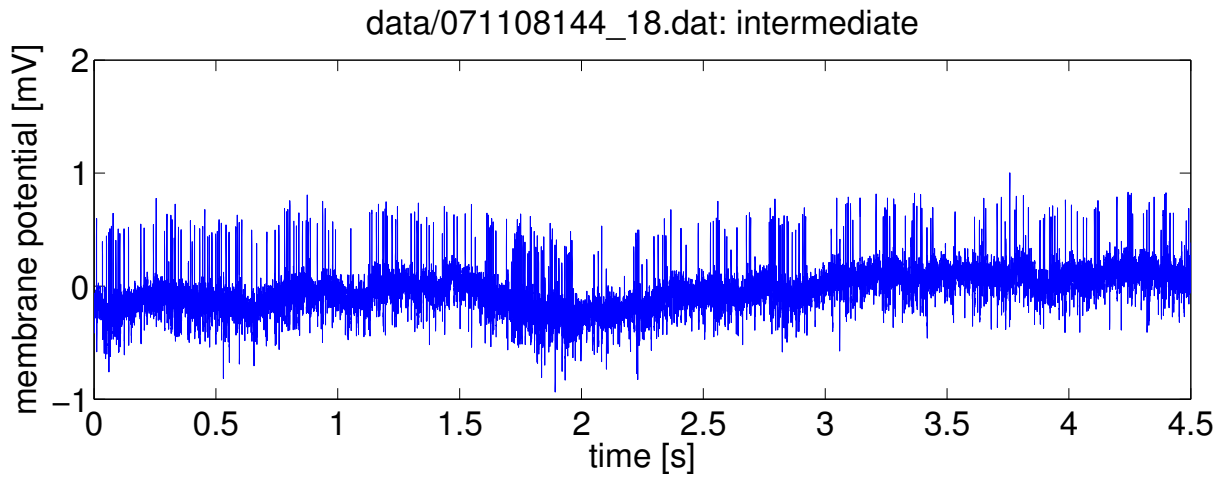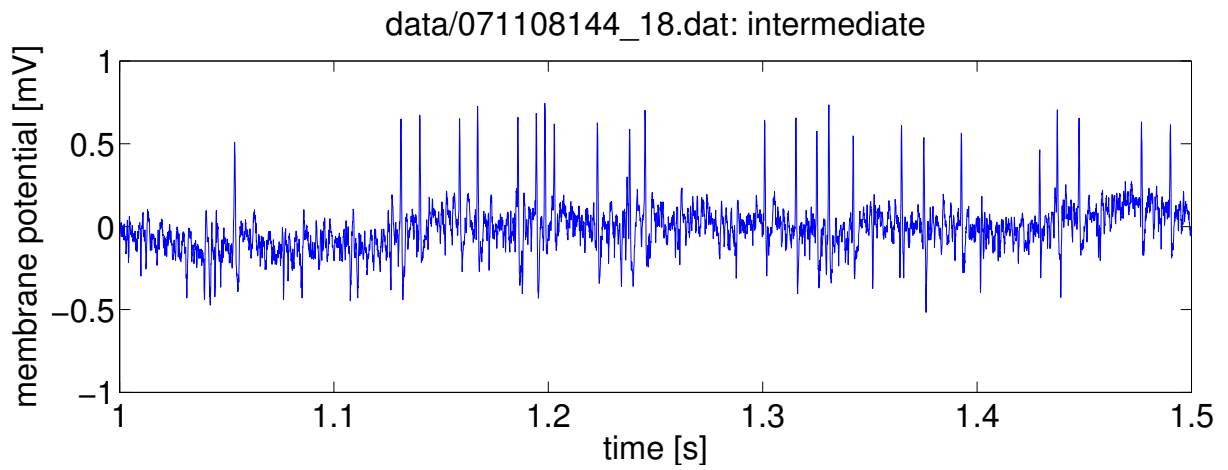

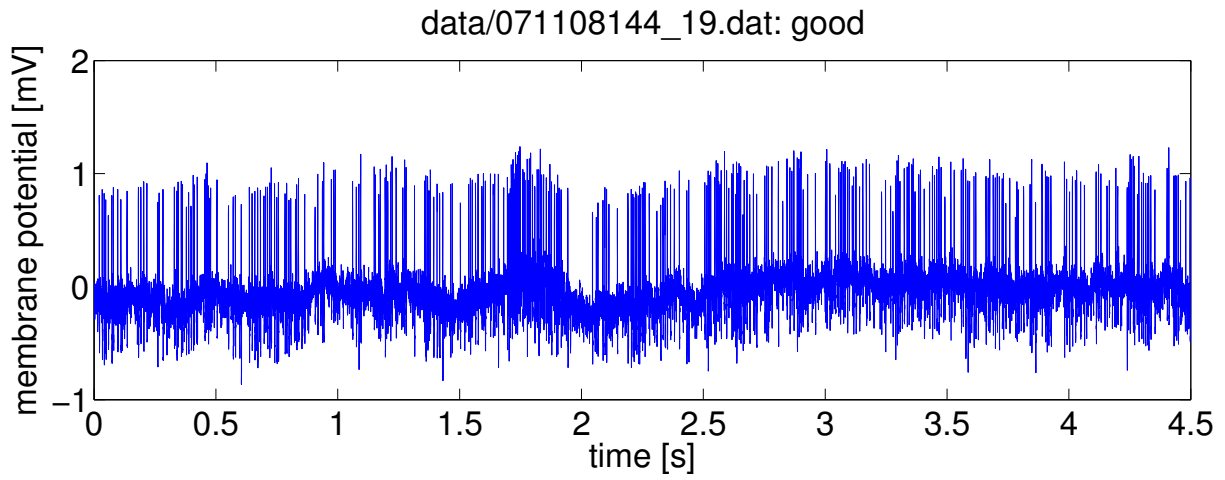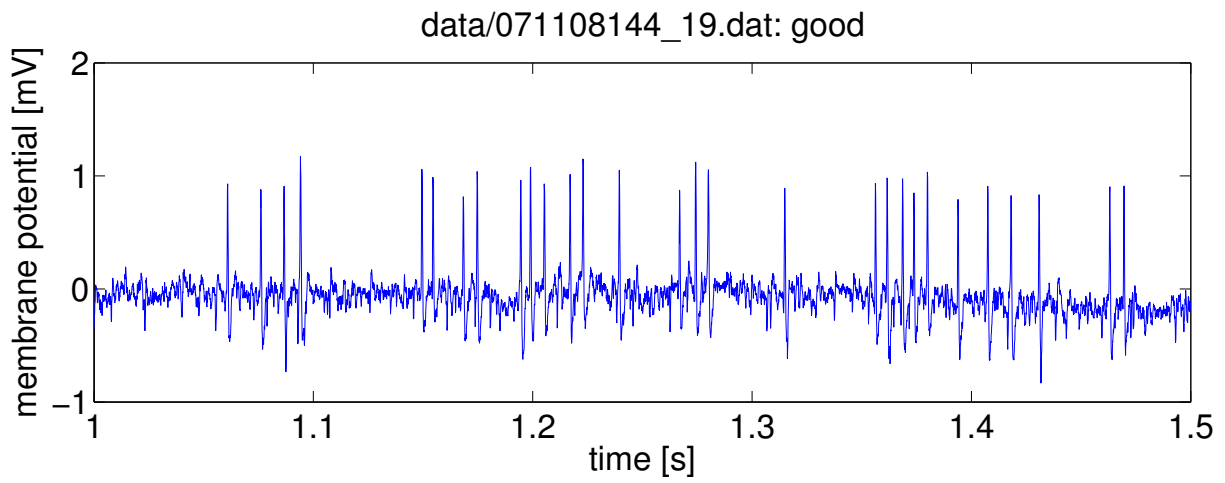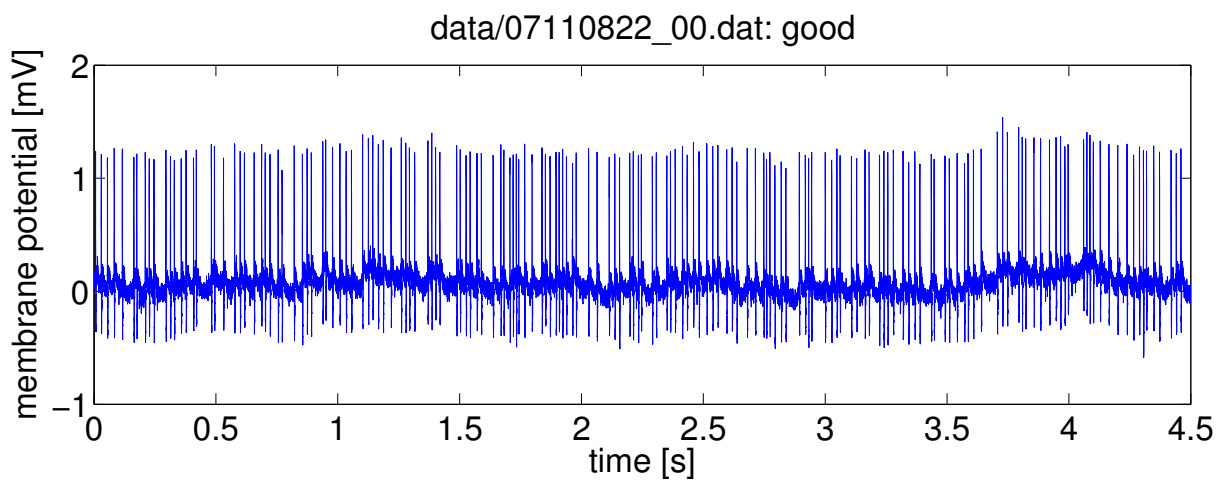

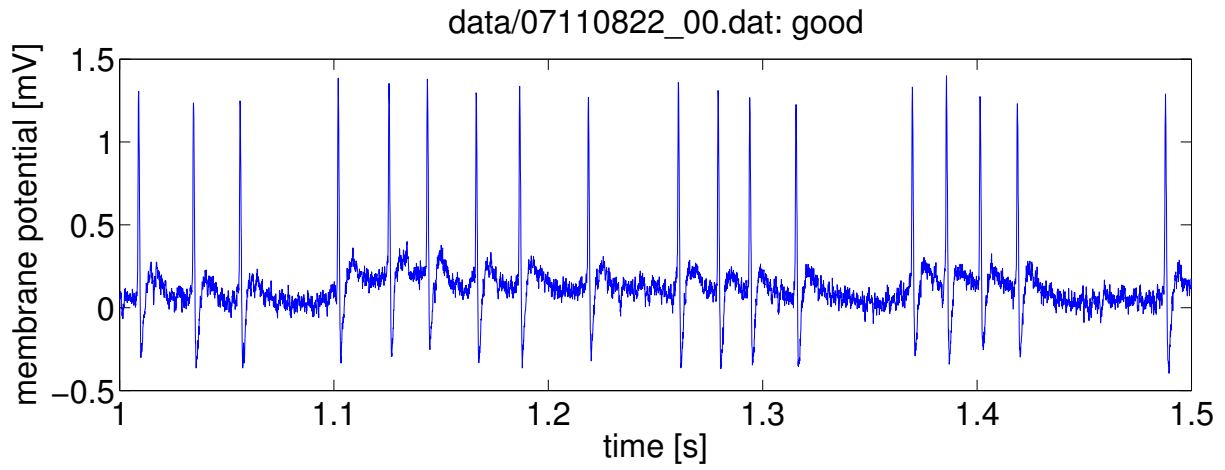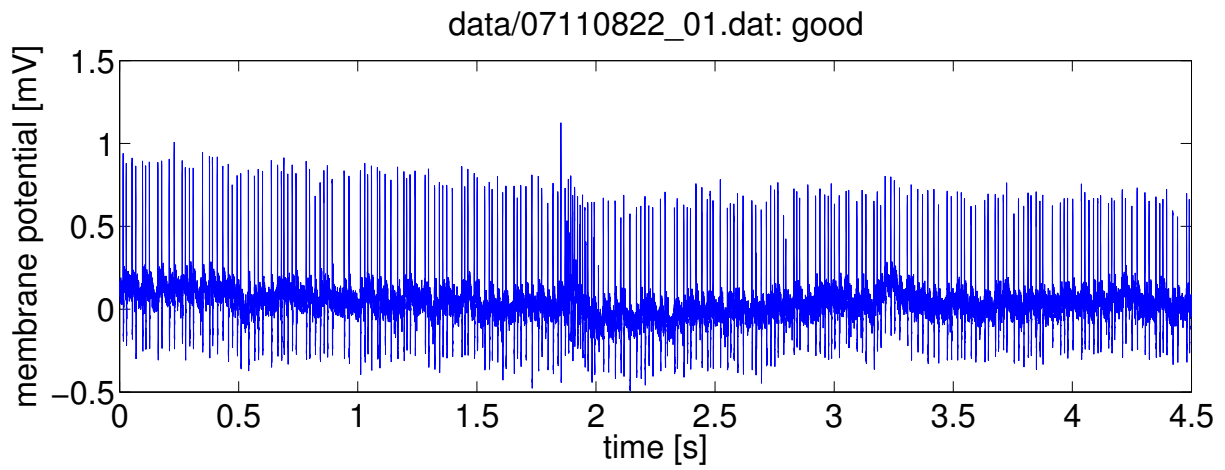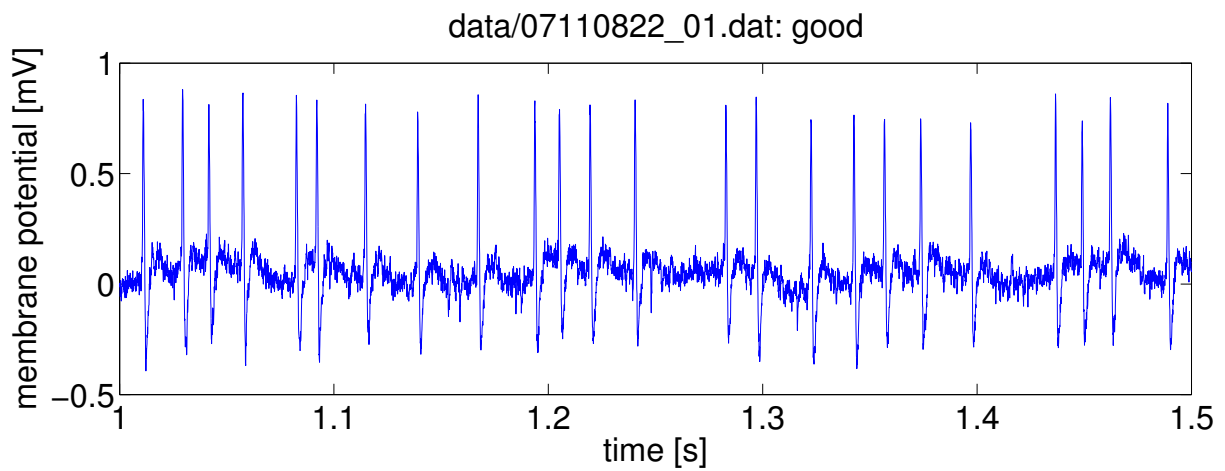

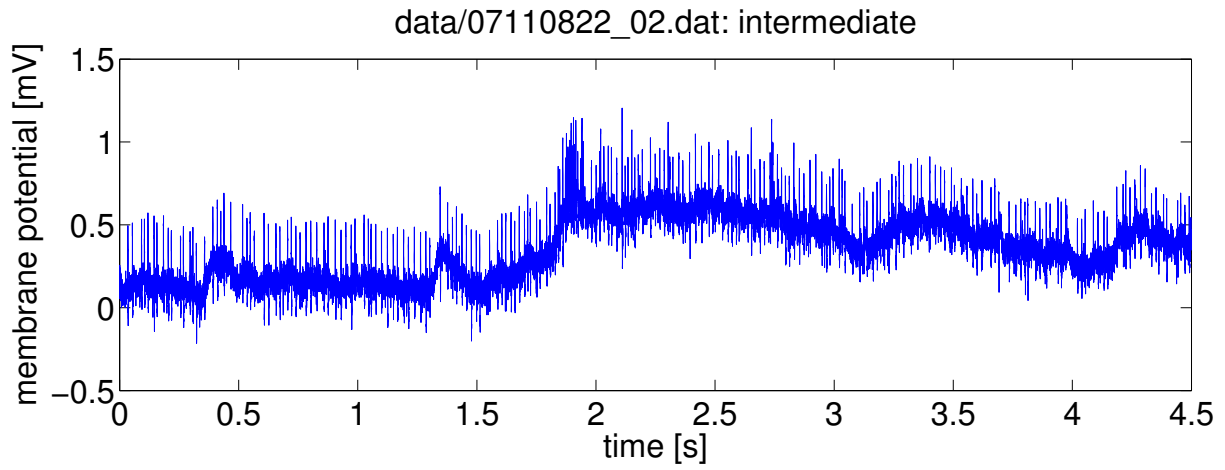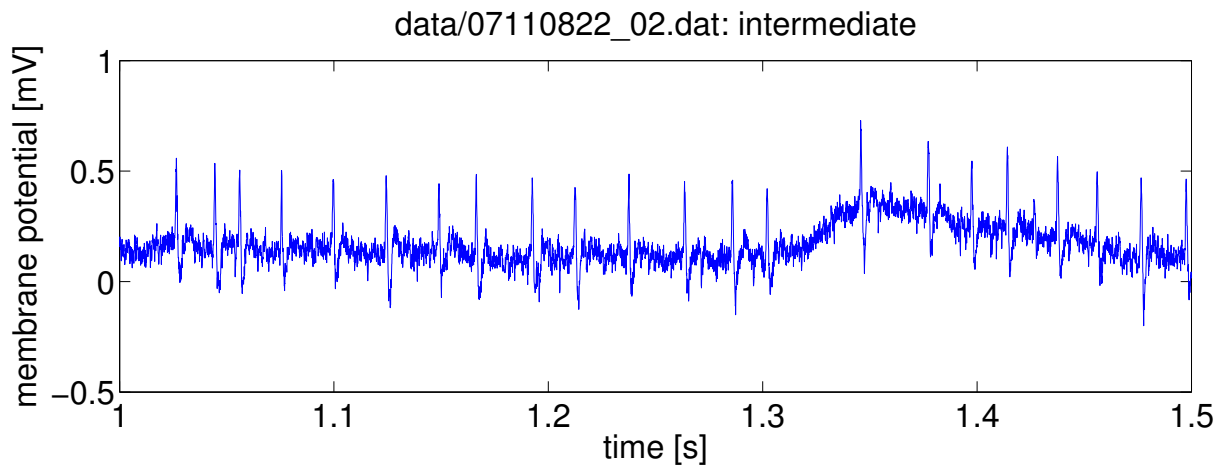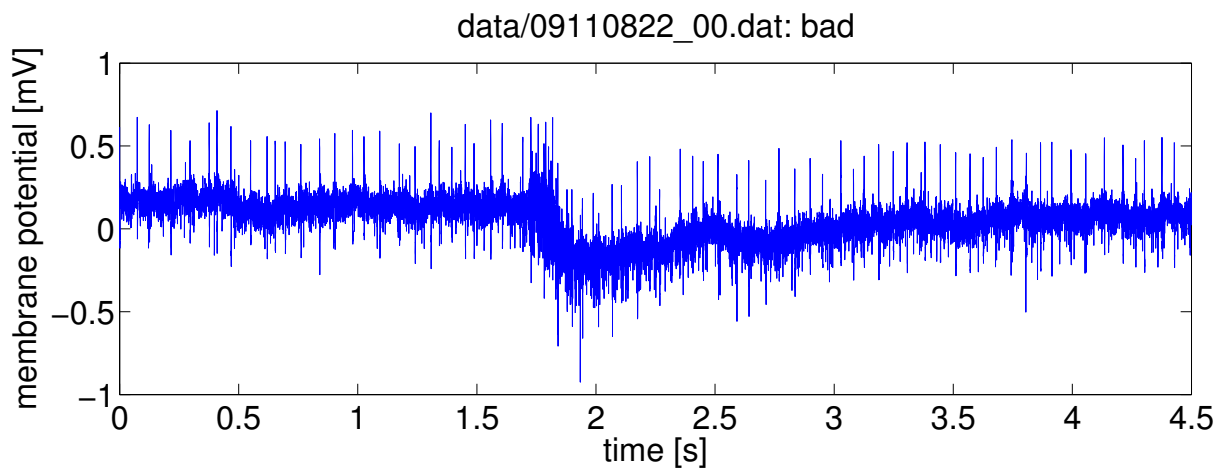

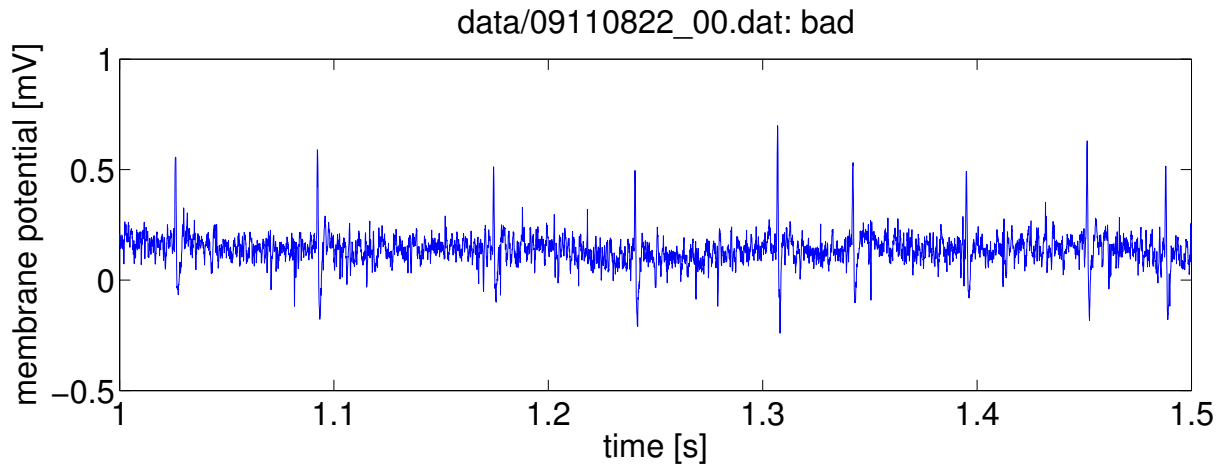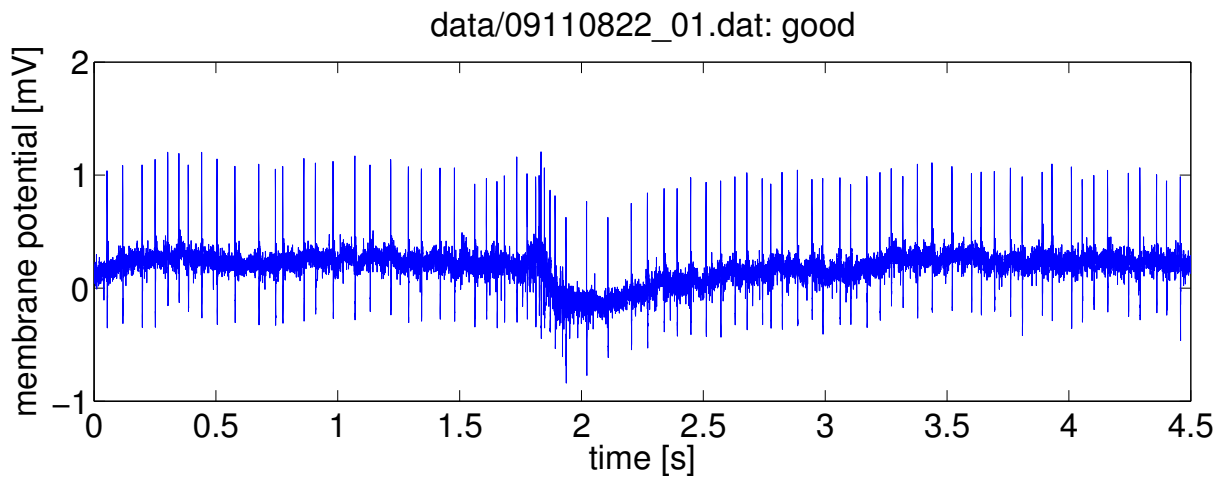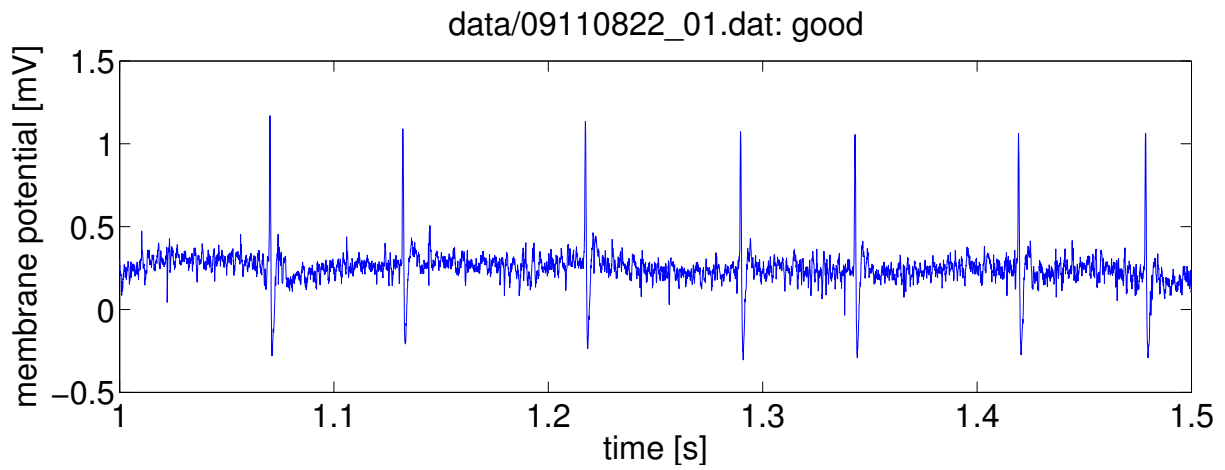



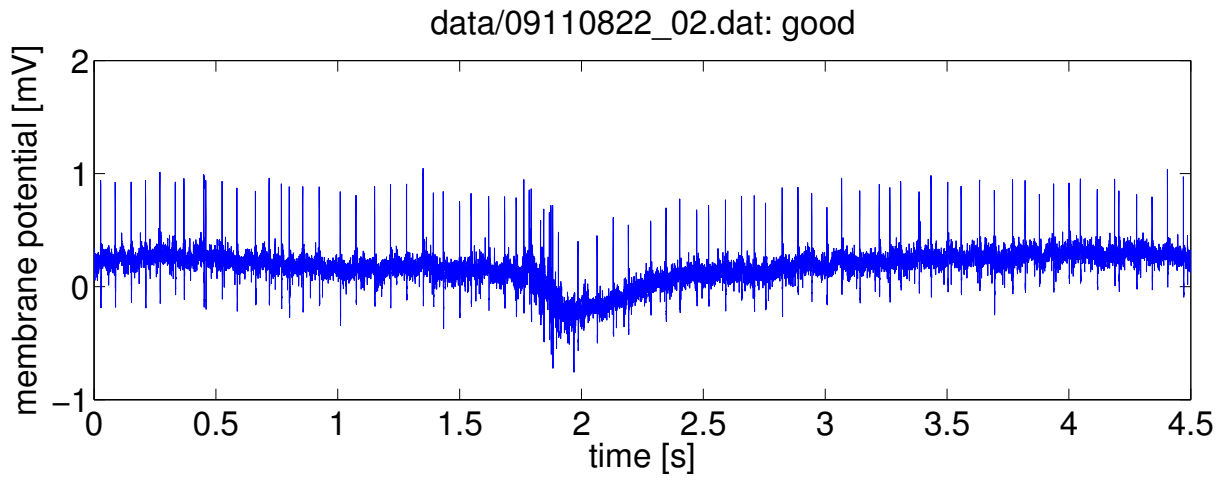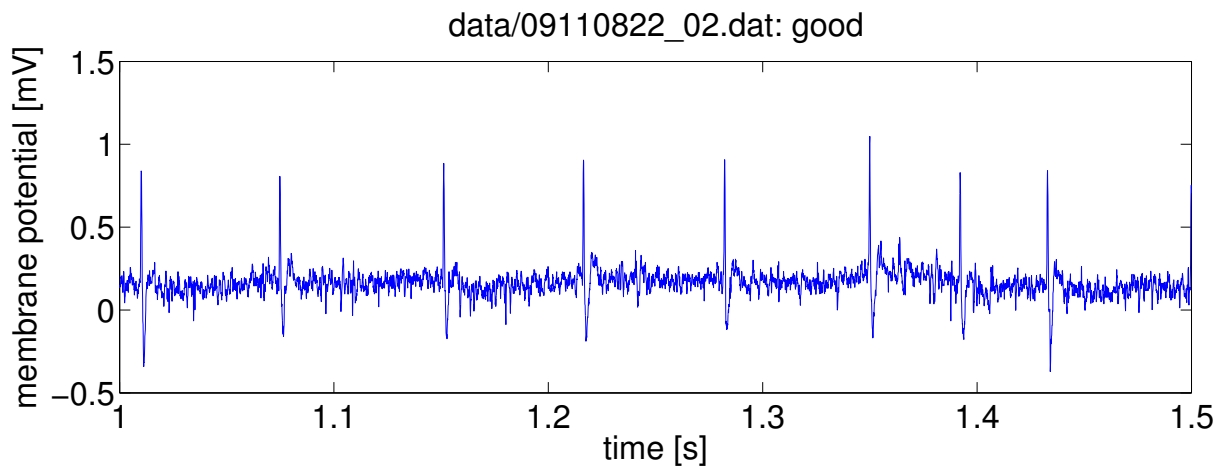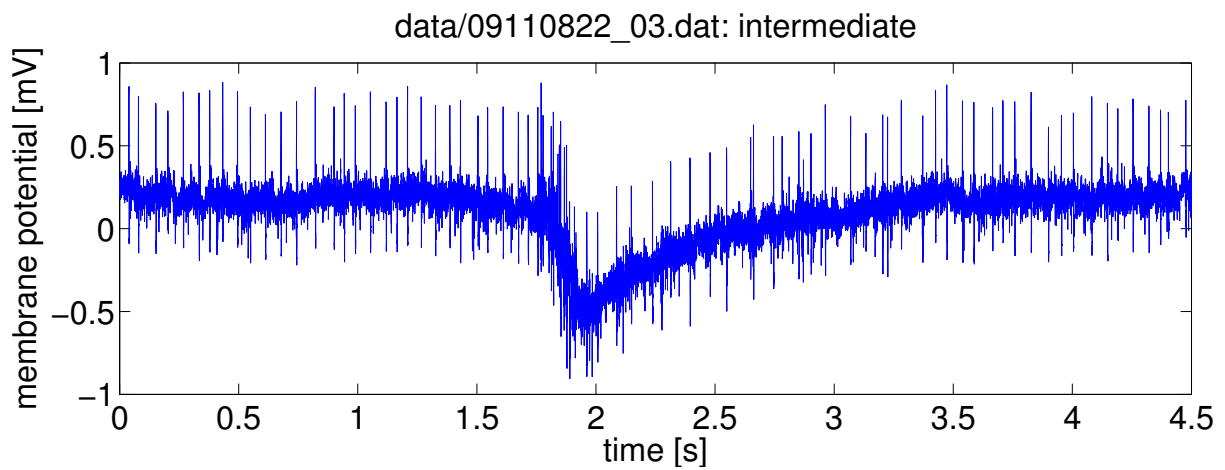

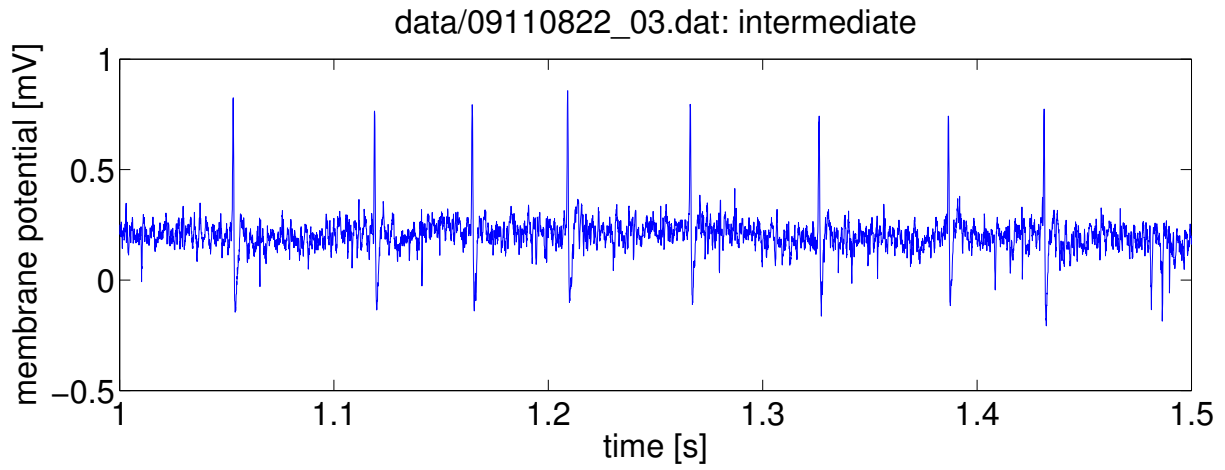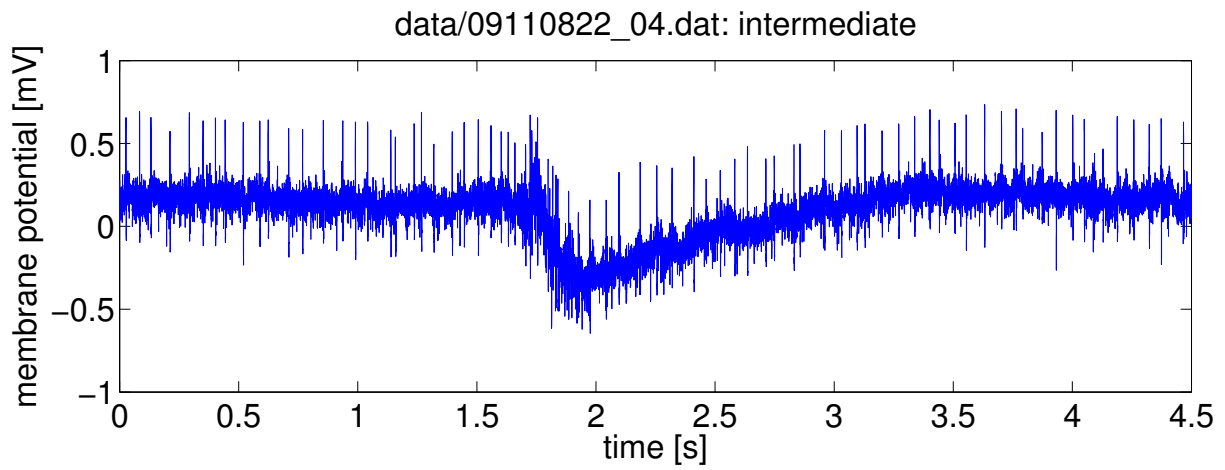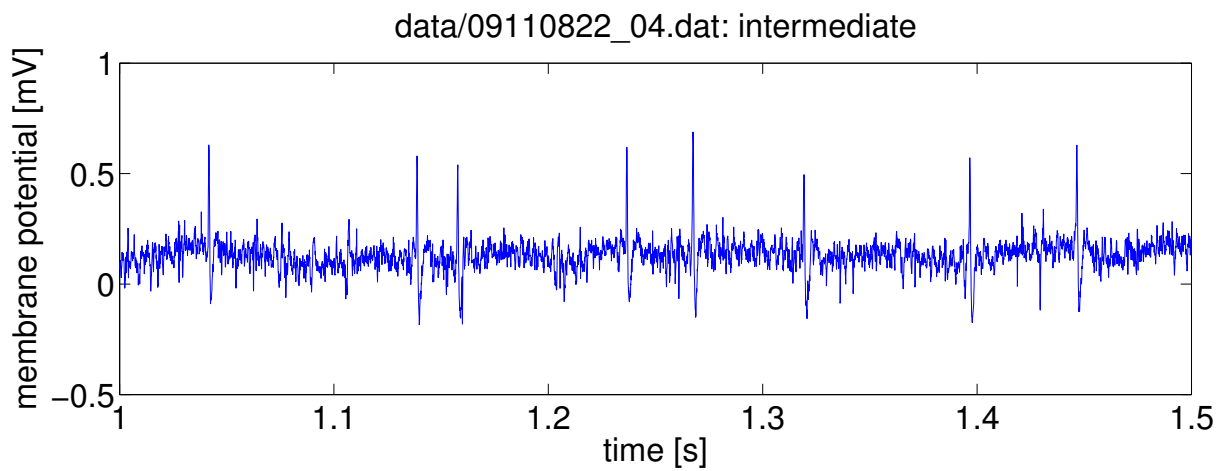

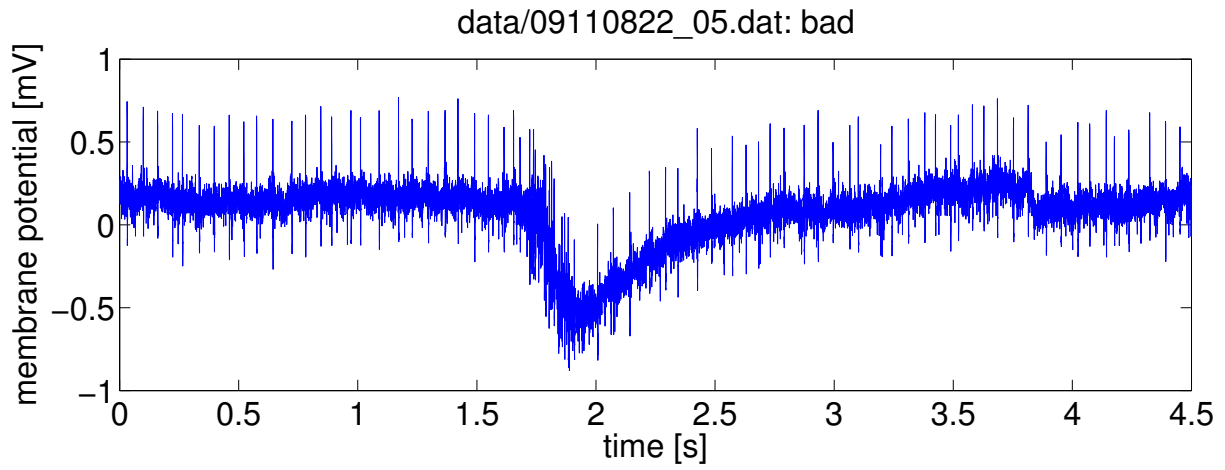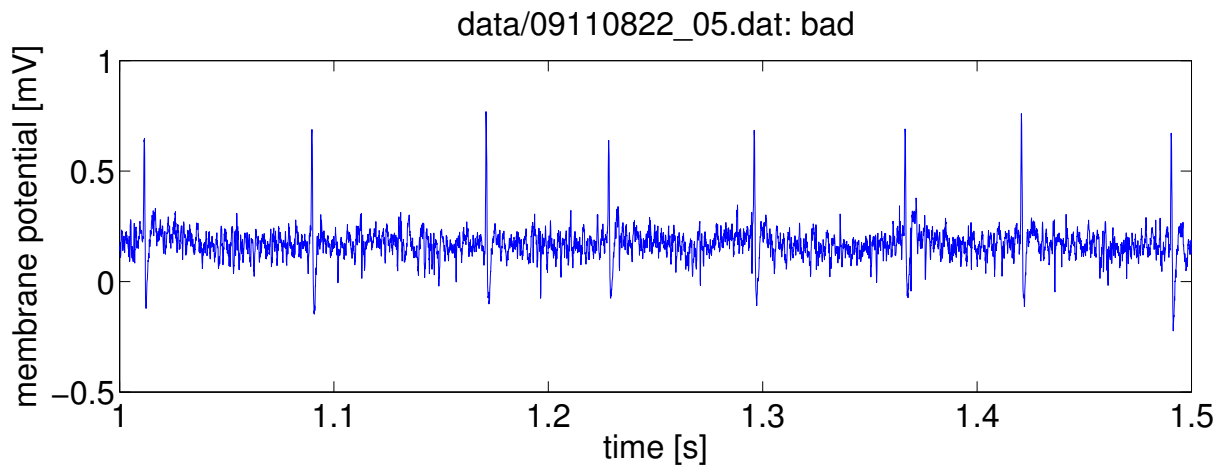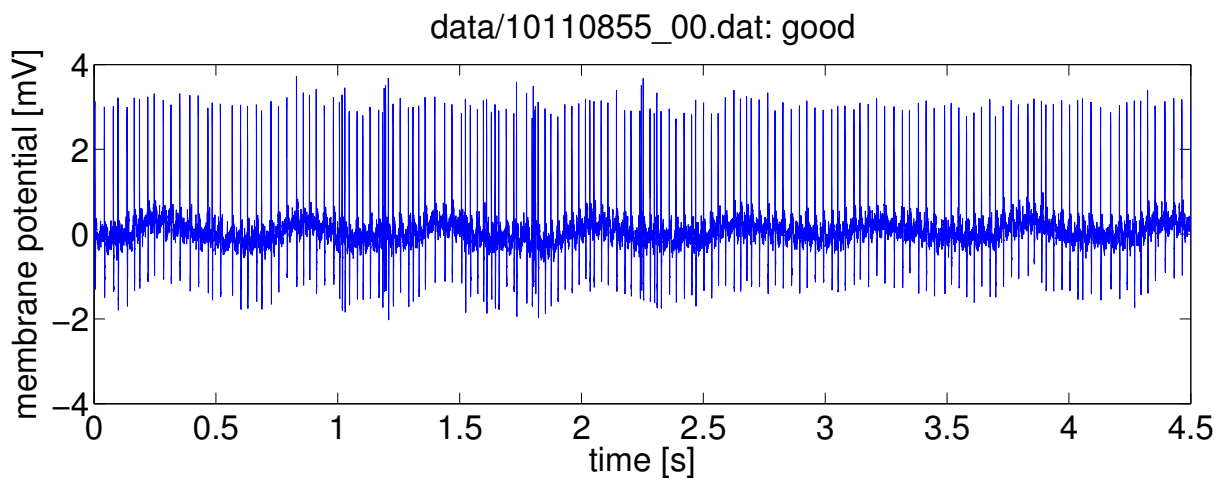

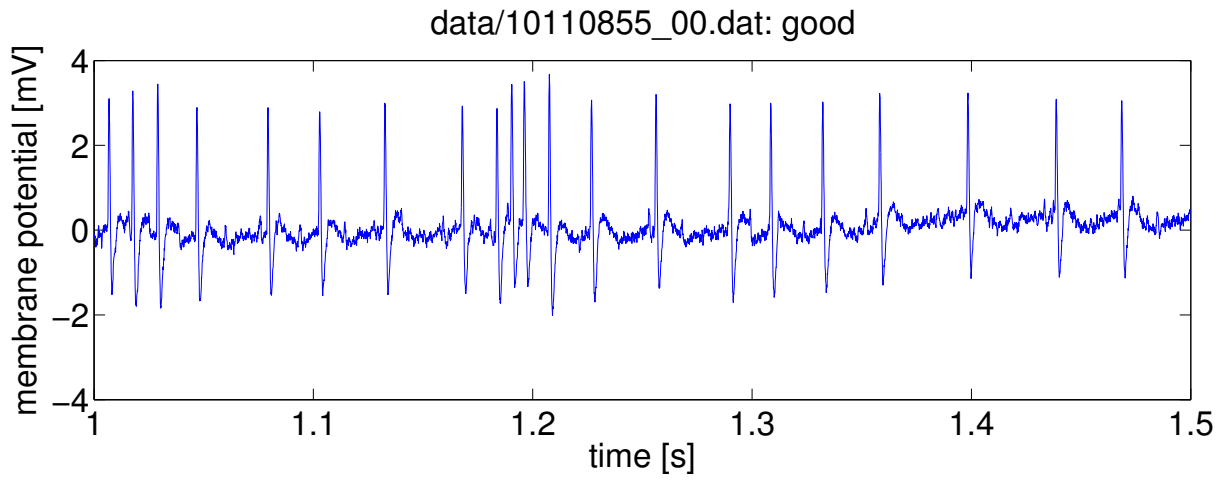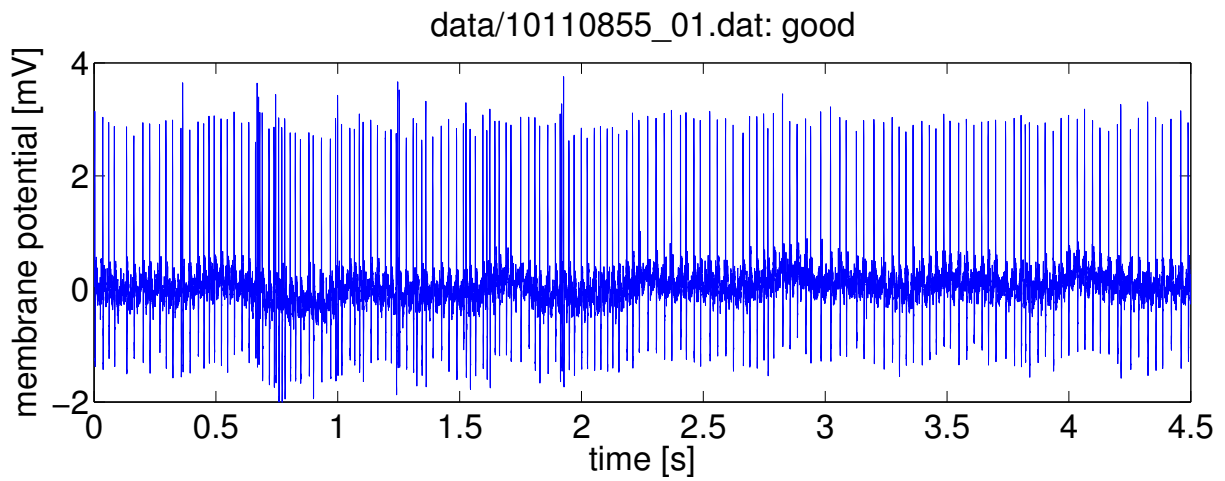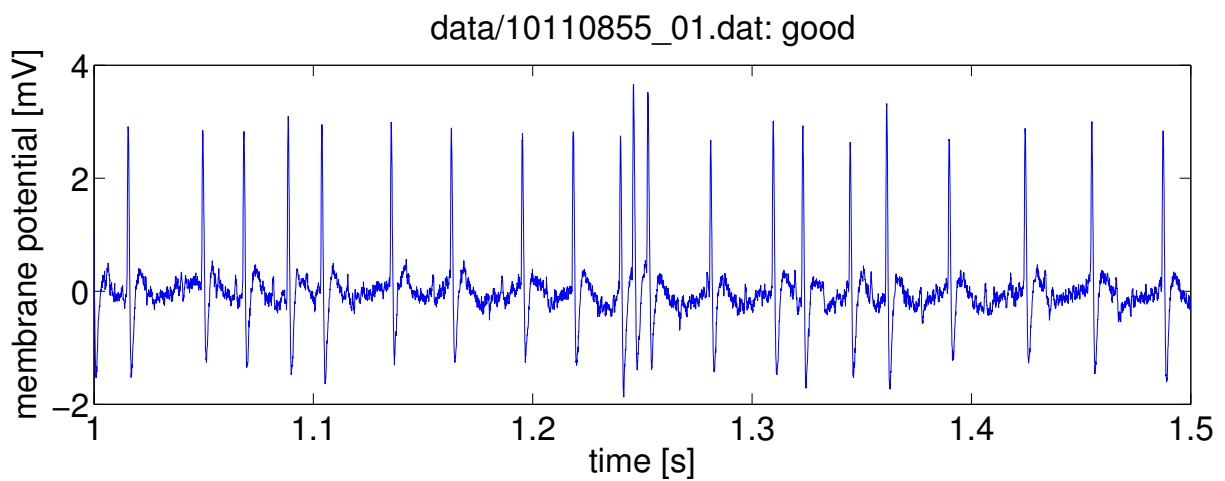

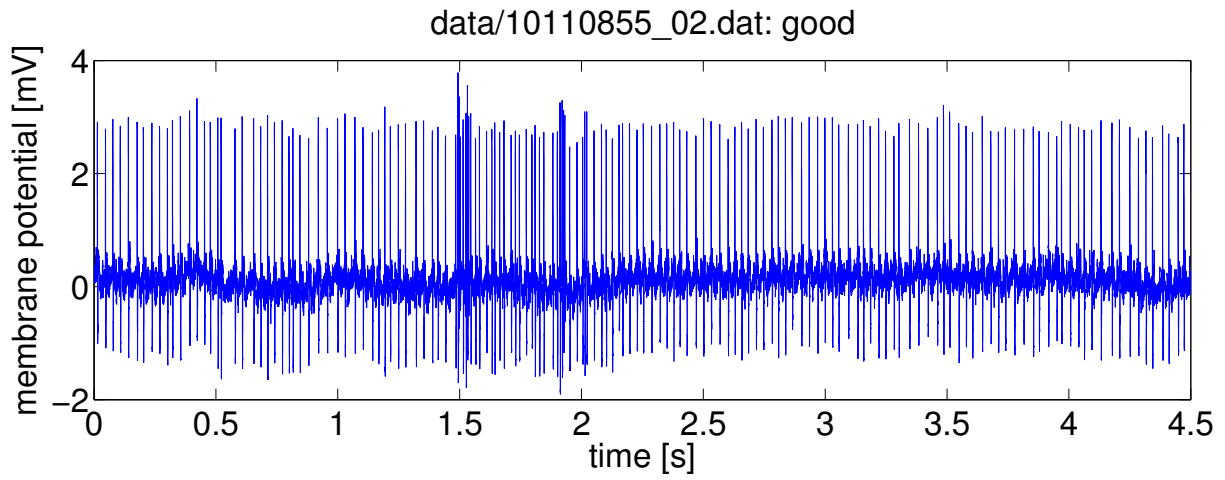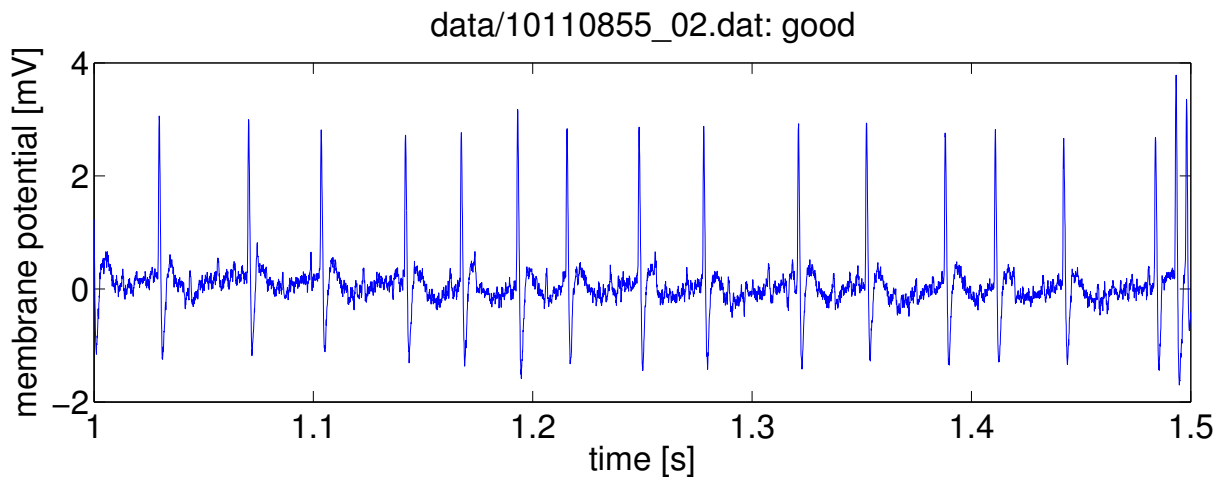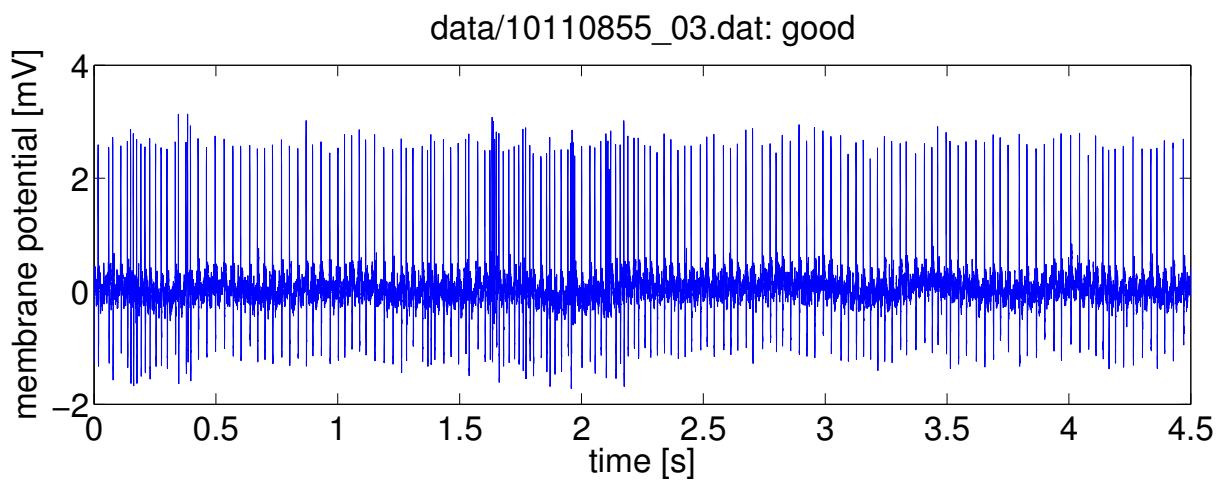

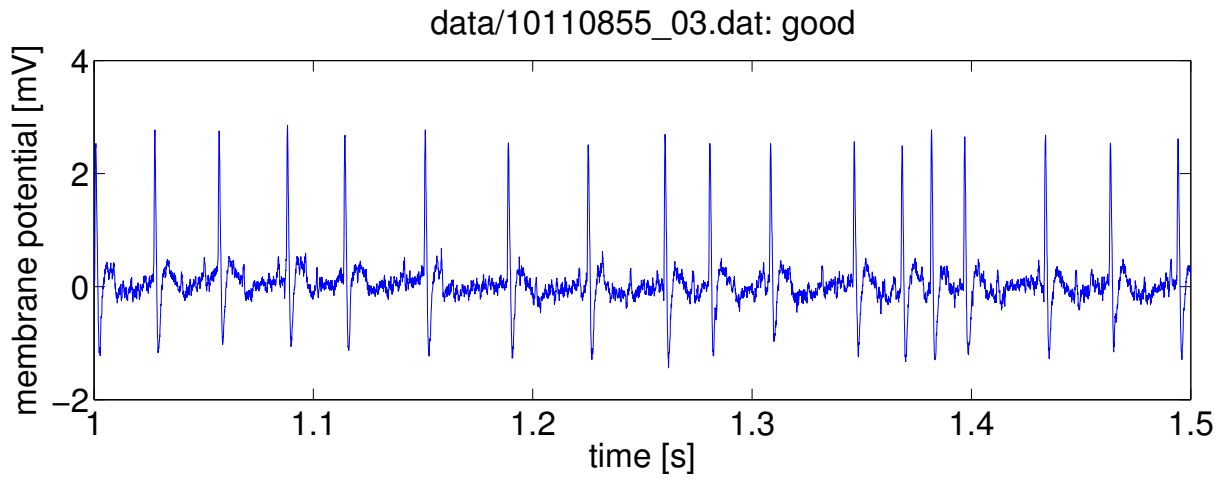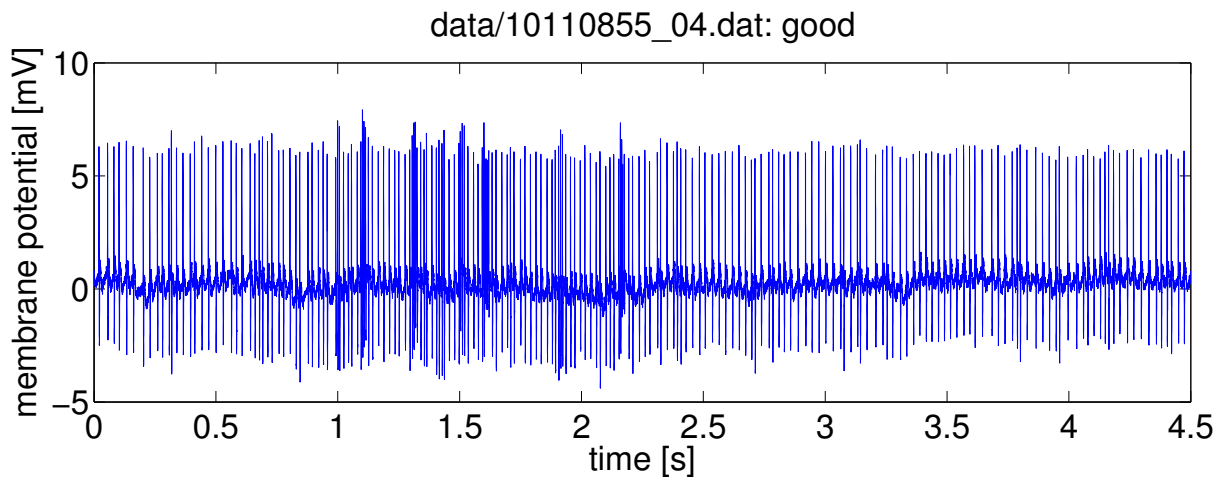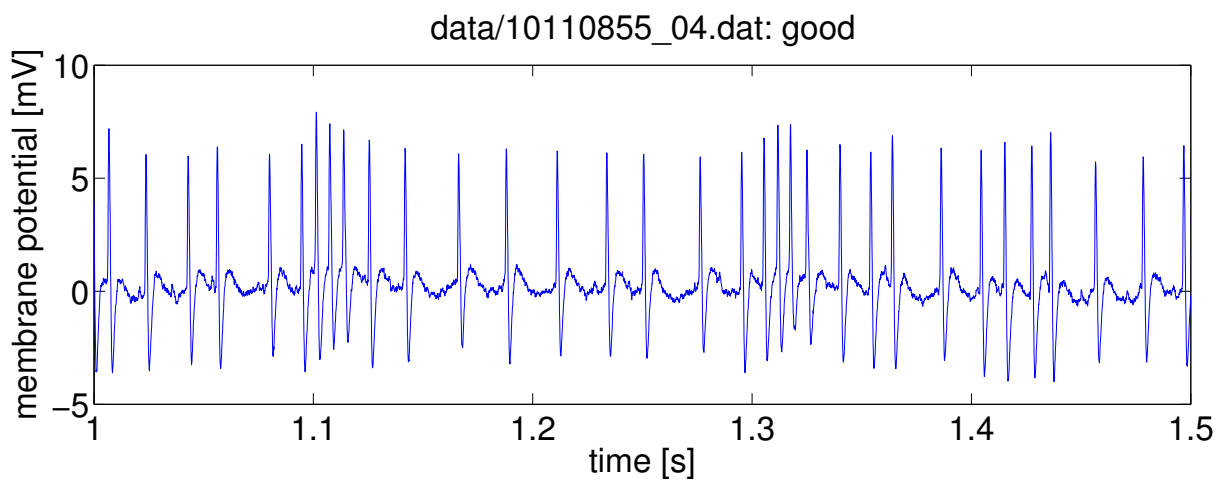

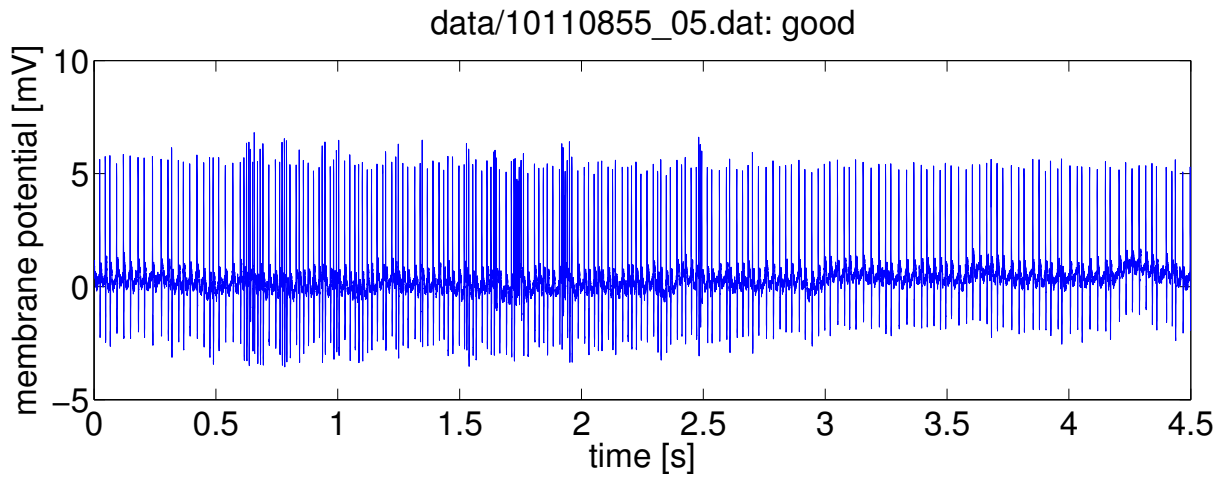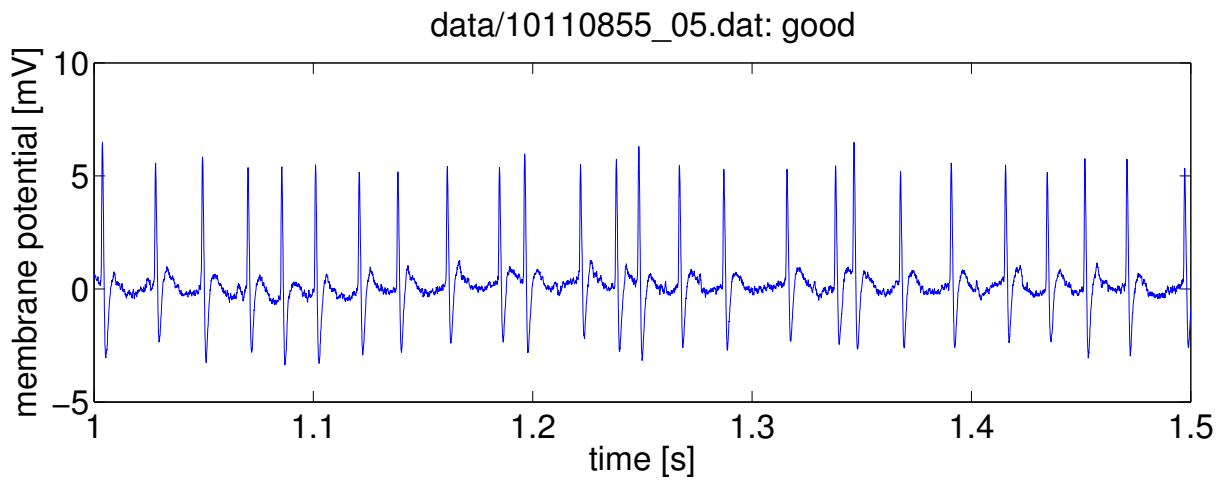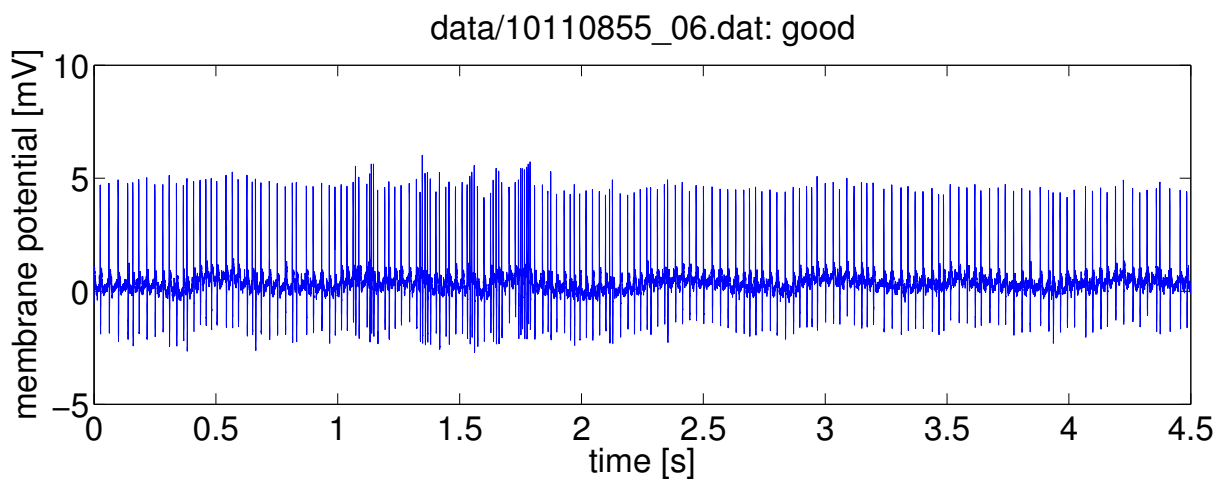

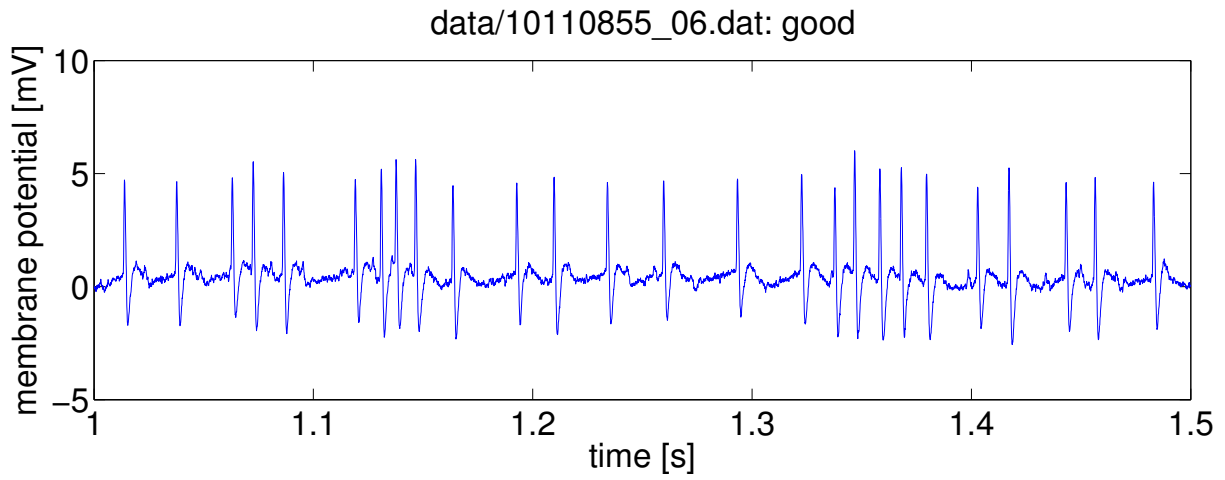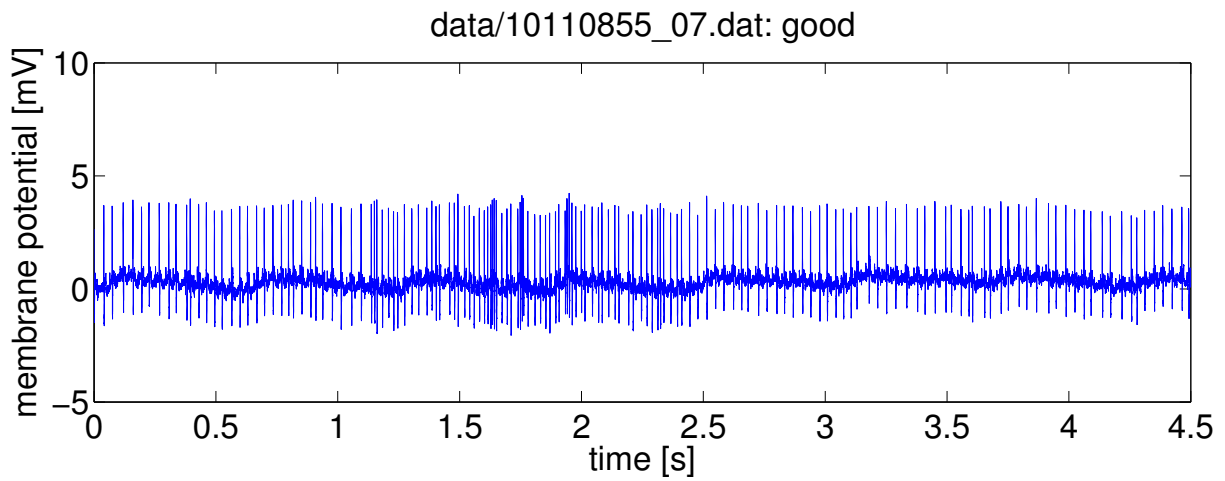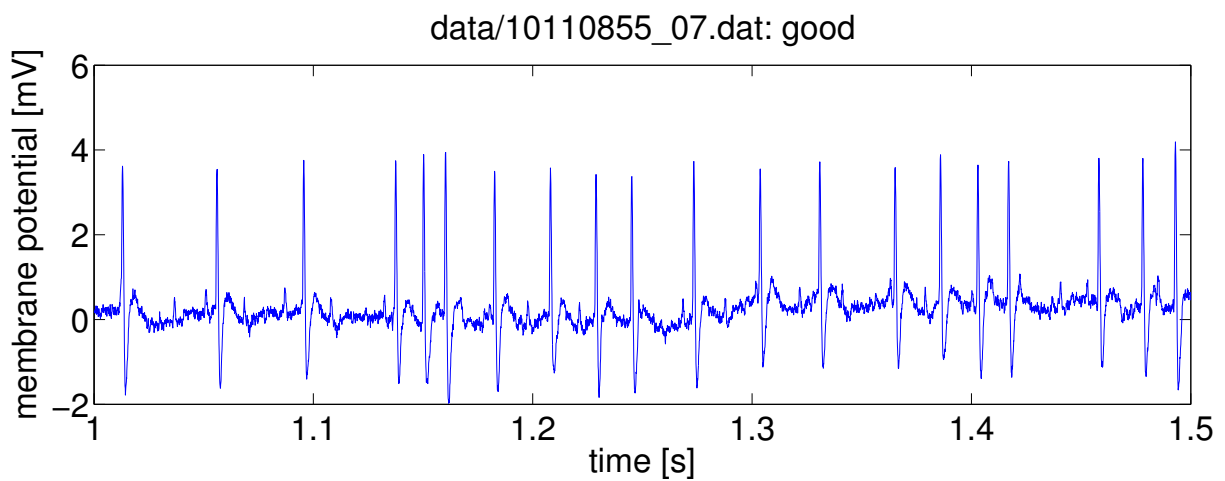



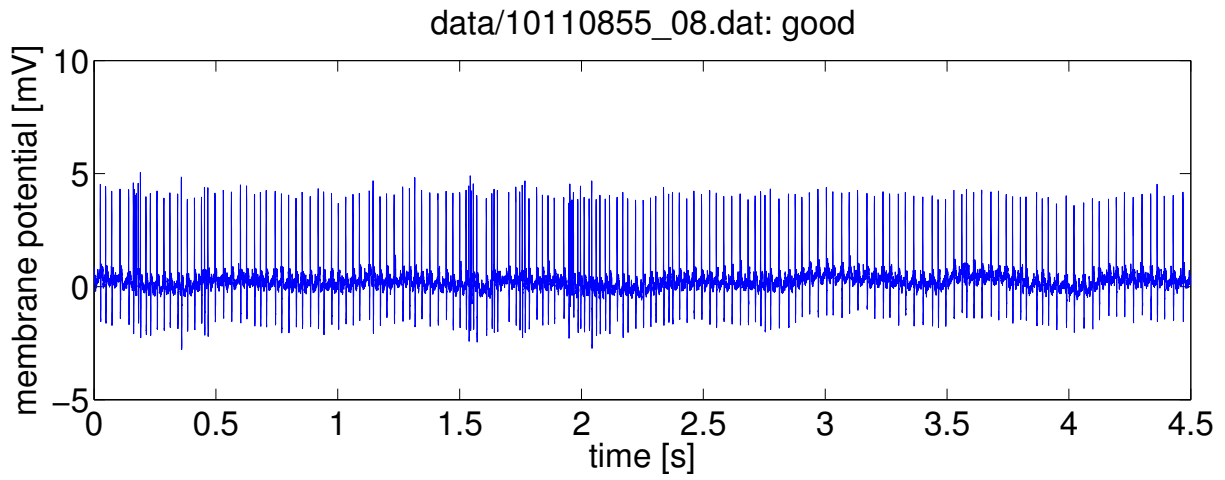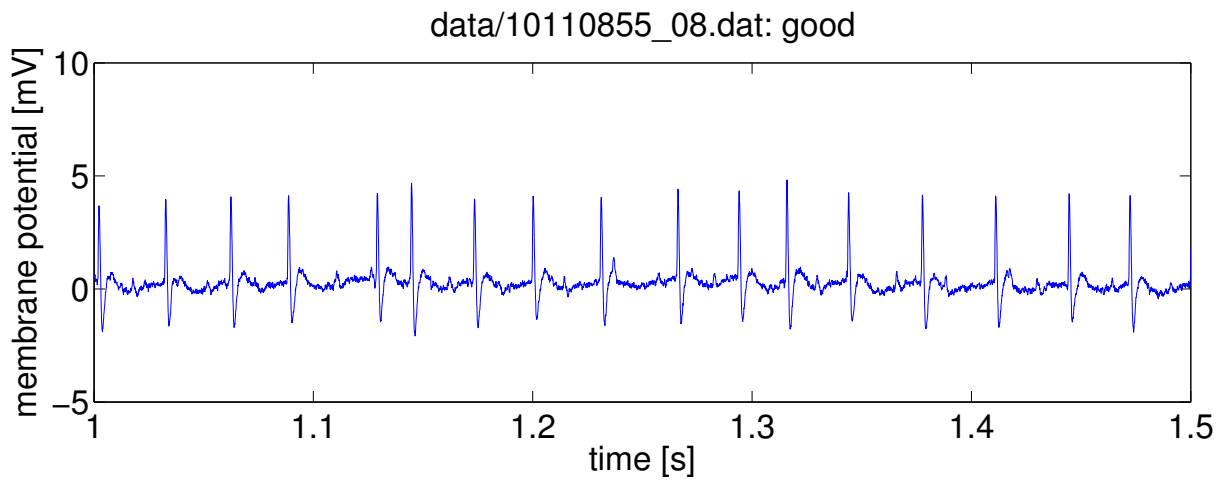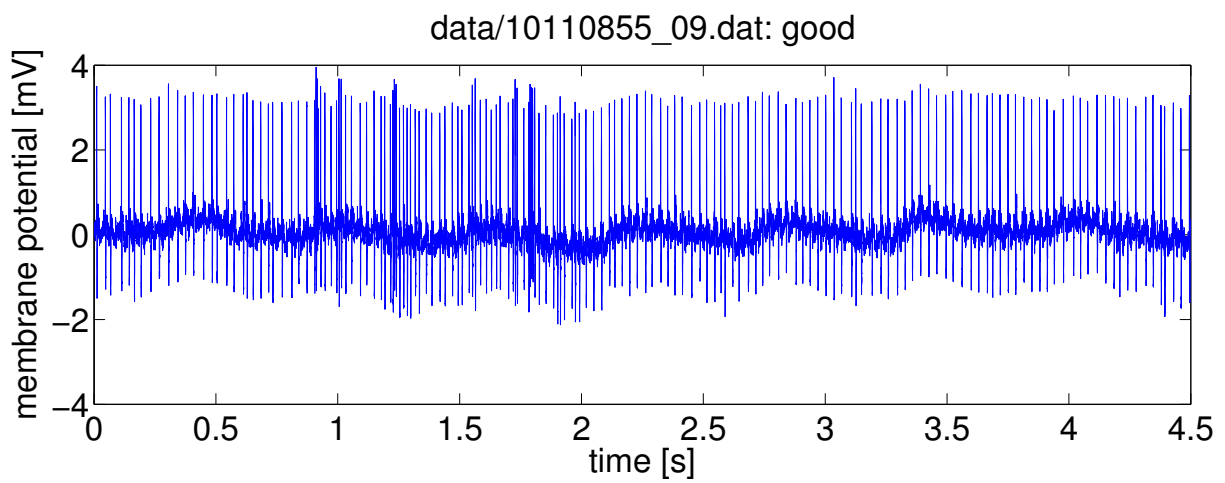

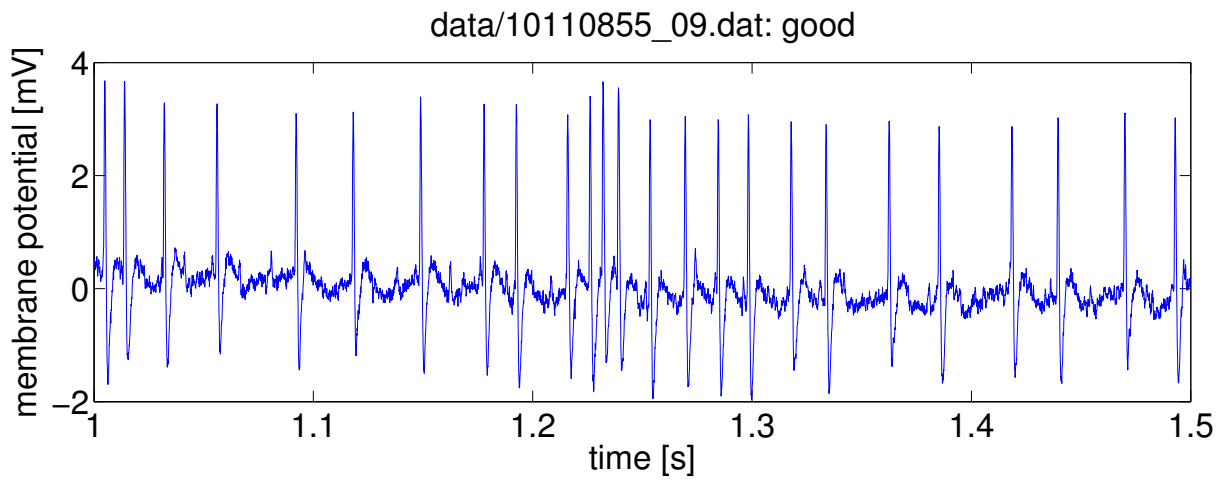

Supplement: pone.0080838.s001.pdf [file pone.0080838.s001.pdf]
